# Supplementary material for: Vaccine targeting SIVmac251 protease cleavage sites protects macaques against vaginal infection
Source: JCI journal article supplement (doi:10.1172/jci138728), 2020-08-27
Supplement: sd1 [file 1]

# Supplementary Materials for

## Vaccine targeting SIVmac251 protease cleavage sites protects macaques against vaginal infection

5 **Authors:** Hongzhao Li<sup>1, †</sup>, Robert W. Omange<sup>1, †</sup>, Binhua Liang<sup>1,2,3, †</sup>, Nikki Toledo<sup>1</sup>, Yan Hai<sup>1</sup>,  
Lewis R. Liu<sup>1</sup>, Dane Schalk<sup>4</sup>, Jose Crecente-Campo<sup>5</sup>, Tamara G. Dacoba<sup>5</sup>, Andrew B. Lambe<sup>6</sup>,  
So-Yon Lim<sup>7</sup>, Lin Li<sup>2</sup>, Mohammad Abul Kashem<sup>1</sup>, Yanmin Wan<sup>8</sup>, Jorge F. Correia-Pinto<sup>5</sup>,  
Michael S. Seaman<sup>7</sup>, Xiao Qing Liu<sup>3,9</sup>, Robert F. Balshaw<sup>10</sup>, Qingsheng Li<sup>8</sup>, Nancy Schultz-  
Darken<sup>4</sup>, Maria J. Alonso<sup>5</sup>, Francis A. Plummer<sup>1,2,††</sup>, James B. Whitney<sup>7,11</sup>, and Ma Luo<sup>1,2,\*</sup>

10

Correspondence to: [ma.luo@canada.ca](mailto:ma.luo@canada.ca); Ma.Luo@umanitoba.ca

15

### This PDF file includes:

20

Supplemental methods (moved from main manuscript with added details)  
Figures. S1 to S12  
Tables S1 to S14 (a Table S14 is added with catalog numbers of antibodies used for  
FACS analysis)

## Supplemental Methods

**Viral load analysis.** Viral RNA was isolated from plasma samples using the Maxwell 16 Viral Total Nucleic Acid Purification kit on the Maxwell 16MDx instrument (Promega, Madison WI).

5 Viral RNA was then quantified using a highly sensitive qRT-PCR assay based on a previously published protocol (116).

**Bio-Plex multiplexed cytokine/chemokine assay.** We used a customized cytokine/chemokine panel targeting 14 (pro- or anti-) inflammatory cytokines/chemokines including Granulocyte Macrophage Colony Stimulating Factor (GM-CSF), Macrophage Chemo-attractant Protein 1  
10 (MCP-1), Monocyte Inflammatory Protein 1 alpha (MIP-1 $\alpha$ ), Monocyte Inflammatory Protein 1 beta (MIP-1 $\beta$ ), CCL5/RANTES, IFN- $\gamma$  inducible protein 10 (IP-10/CXCL-10), Tumor Necrosis Factor alpha (TNF- $\alpha$ ), Interferon gamma (IFN- $\gamma$ ), IL-1 $\alpha$ , IL-8, IL-10, IL-17a, IL-1 $\beta$ , and IL-6. Mucosal inflammatory responses and cellular recall responses (see below) were measured using cervicovaginal lavage (CVL) and PBMC culture supernatant samples, respectively. Antibodies  
15 and protein standards used in these assays are listed in Table S9. The CVL sample collection method was described previously(13). For the CVL assay, PBS with 1% BSA (Assay buffer) was used both as general diluent and blank controls, while RPMI-1640 Culture Medium (Sigma, R8758-6X500ML) was used as diluent for standards and blank controls for the PBMC supernatant samples. In order to generate the standard curves, we prepared a cytokine/chemokine  
20 protein standard pool with final concentrations listed in Table S10, using PBS with 1% BSA as diluent. We then prepared eight four-fold serial dilutions of this cytokine/chemokine protein standard pool and transferred 50  $\mu$ L of each dilution to a 96-well Bio-Plex Pro<sup>TM</sup> Flat bottom plate (BioRad, Catalog# 171025001). Final standard curves were optimized and generated using Bio-Plex Manager 6.1 software, where coefficient of variation (%CV) was no more than 30%

and percentage of recovery was at least 70. 20  $\mu\text{g}$  of capture antibody for each cytokine/chemokine type was coupled to  $1.25 \times 10^7$  Bio-Plex Pro™ Magnetic COOH Beads (BioRad, Catalog# MC10053-01) using Bio-Plex Amine Coupling Kit (Bio-Rad, Catalog# 171-406001) according to the manufacturer's suggestions and diluted to a final concentration of  $5 \times 10^6$  beads/mL. 50  $\mu\text{L}$  of undiluted sample was added to each well containing ~420,000 coupled magnetic beads/capture antibody type (1 in 600 dilutions) and incubated while shaking at high speed (~1000rpm) for 30 seconds, then at medium speed (~300rpm) for one hour on a plate shaker at room temperature. After washing the plate 3 $\times$  (MAG3 $\times$  setting on BioRad wash station) with wash buffer (PBS with 0.05% Tween20), 30  $\mu\text{L}$  of biotinylated detection antibody at 1 $\mu\text{g}/\text{mL}$  was added to each well and again incubated while shaking for 30 minutes at room temperature. After another routine wash, 50  $\mu\text{L}$  of Streptavidin-PE in 1:100 dilution of BioRad 1 $\times$  stock (Catalog# 171304501) was added per well and incubated while shaking for 10 min at room temperature. A final wash was performed and afterwards 125  $\mu\text{L}$  of assay buffer was added to each well. After shaking the plate for 10 seconds, we ran the plate on a Bio-Rad Bio-Plex™ 200 System. Each bead fluorescence intensity and corresponding protein concentration (pg/mL) were generated by Bio-Plex Manager 6.1 software. To take into account dilution variations during CVL sample collections, cytokine/chemokine concentrations were all normalized to total protein concentrations in the same sample. CVL total protein concentration was quantified using NanoOrange® protein quantitation kit (Thermo Fisher Scientific) according to the supplier's protocol.

**MHC typing and Bio-Plex multiplexed antibody assay.** Plasma IgG antibodies to SIV antigens were quantified by largely following the previously published protocols (22, 23) with slight modifications. Briefly, 20  $\mu\text{g}$  of antigen peptide (synthesized by Genscript, Piscataway,

NJ) was coupled to  $1.25 \times 10^6$  Bio-Plex Pro™ Magnetic COOH Beads (Bio-Rad) using a Bio-Plex Amine Coupling Kit (Bio-Rad). 50 µl plasma (1:80 diluted) was incubated with 2,500 beads/antigen type. SIV-specific IgG was detected with phycoerythrin-labelled mouse anti-monkey IgG (Southern Biotech, Birmingham, AL) at 5 µg/ml. Bead fluorescence intensities were acquired on the Bio-Plex 200 system (Bio-Rad) and converted to concentrations based on estimation using a PCS2 monoclonal antibody (National Microbiology Laboratory, Canada) as standard.

High-resolution MHC typing was conducted by Wisconsin National Primate Research Center Genetics Services ([https://www.primate.wisc.edu/?page\\_id=4512](https://www.primate.wisc.edu/?page_id=4512)).

**IFN-γ enzyme-linked immunospot (ELISPOT) assay.** Freshly isolated PBMCs ( $2-2.5 \times 10^5$ /well) were stimulated for 16-18 hours in a 96-well pre-coated plate (ELISpotPLUS kit, MABTECH Inc., Mariemont, OH) at 37°C in a 5% CO<sub>2</sub> incubator. Stimulation was performed with PCS peptide pool, targeting subsets of PCSs (PCS1-4, PCS5-8 and PCS9-12, respectively), at 2.5µg/ml per individual peptide. The sequences of these peptides (Sigma-Aldrich) were listed in Table S11. Cells stimulated with 5.0 µg/ml of concanavalin A (Sigma Chemical, St. Louis, MO) were used as positive control. All tests were performed in duplicate. Wells were imaged with an AID ELISPOT reader (AID, Strassberg, Germany), and counted by AID EliSpot Reader version 3.2.3, with set parameters for spot size, intensity and gradient. Background (mean of wells without peptide) levels were subtracted from each well on the plate. A response was considered positive if the mean number of SFCs of duplicate sample wells exceeded twice the background and was  $>50$  SFC per  $1 \times 10^6$  cells.

**Cell culture of PBMCs and PCS peptide stimulation for analysis of multiple cytokine secretions or T cell subsets.**  $2.0 \times 10^6$  PBMCs/ml in R10 media (RPMI1640-HyClone + 10%



FBS + 2% antibiotic/antimycotic, Thermo Fisher Scientific) were added into each well of a 96-well plate, and cultured in media only (no-stimulation negative control), in the presence of 0.001µg/ml PMA with 0.01µg/ml Ionomycin (positive control), or with 1.5µM SIV PCS peptide pools (Sigma-Aldrich, Table S11), overnight at 37°C with 5% CO<sub>2</sub>. Cytokines secreted into the culture supernatants were analyzed by the Bio-Plex multiplexed cytokine assay as described above. For flow cytometry analysis (with intracellular staining) of T cell subsets, PBMC culture and stimulation were performed in the presence of protein transport inhibitors, 50nL GolgiStop<sup>TM</sup> (monensin) and 200nL GolgiPlug (brefeldin A).

**Animal anesthesia.** Sedation (ketamine alone, or ketamine/dexmedetomidine, atipamezole for reversal) was provided during the experimental procedures. For anesthesia, animals were immobilized against the front of the cage by a squeeze back mechanism, and anesthetized using up to 7 mg/kg ketamine (i.m.) and up to 0.03 mg/kg dexmedetomidine (i.m.) to be reversed at the conclusion of a procedure by up to 0.3 mg/kg atipamezole (i.v. or i.m.). Any additional anesthesia was administered only in consultation with a WNPRC veterinarian. Alternative anesthesia would only be used as directed by a WNPRC veterinarian. The duration of anesthesia was usually less than 45 minutes. Monitoring of anesthesia recovery was documented every 15 min until the animal was sitting upright, then every 30 minutes until the animal was fully recovered from the anesthesia.

**Menstrual phase distributions of SIV challenges (standard)**

| Group   | Animal ID | Number of challenges |      | Time of infection |
|---------|-----------|----------------------|------|-------------------|
|         |           | LT                   | N-LT |                   |
| Control | cy0774    | 1                    | 1    | LT                |
| Control | cy0775    | 1                    | 1    | LT                |
| Control | cy0776    | 0                    | 1    | N-LT              |
| Control | cy0777    | 2                    | 2    | N-LT              |
| Control | cy0778    | 3                    | 3    | -                 |
| Control | cy0779    | 3                    | 3    | -                 |
| Control | cy0780    | 2                    | 2    | LT                |
| Control | cy0781    | 2                    | 0    | LT                |
| PCS     | cy0758    | 2                    | 1    | LT                |
| PCS     | cy0759    | 3                    | 3    | -                 |
| PCS     | cy0760    | 3                    | 3    | -                 |
| PCS     | cy0761    | 3                    | 3    | -                 |
| PCS     | cy0762    | 3                    | 3    | -                 |
| PCS     | cy0763    | 3                    | 3    | -                 |
| PCS     | cy0764    | 1                    | 1    | LT                |
| PCS     | cy0765    | 3                    | 3    | -                 |

LT: luteal phase; N-LT: non-luteal phase; - : not infected

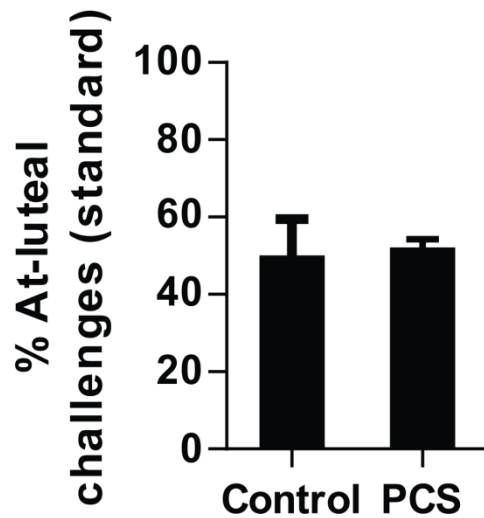

**Fig. S1 Menstrual phase distributions of SIV challenges.** Data were based on the standard challenge protocol (six challenges)

# Menstrual phase distributions of SIV challenges (extended)

| Group   | Animal ID | Number of challenges |      | Time of infection |
|---------|-----------|----------------------|------|-------------------|
|         |           | LT                   | N-LT |                   |
| Control | cy0774    | 1                    | 1    | LT                |
| Control | cy0775    | 1                    | 1    | LT                |
| Control | cy0776    | 0                    | 1    | N-LT              |
| Control | cy0777    | 2                    | 2    | N-LT              |
| Control | cy0778    | 7                    | 6    | -                 |
| Control | cy0779    | 7                    | 6    | -                 |
| Control | cy0780    | 2                    | 2    | LT                |
| Control | cy0781    | 2                    | 0    | LT                |
| PCS     | cy0758    | 2                    | 1    | LT                |
| PCS     | cy0759    | 7                    | 6    | LT                |
| PCS     | cy0760    | 6                    | 7    | -                 |
| PCS     | cy0761    | 7                    | 6    | -                 |
| PCS     | cy0762    | 4                    | 5    | LT                |
| PCS     | cy0763    | 6                    | 7    | -                 |
| PCS     | cy0764    | 1                    | 1    | LT                |
| PCS     | cy0765    | 5                    | 6    | LT                |

LT: luteal phase; N-LT: non-luteal phase; - : not infected

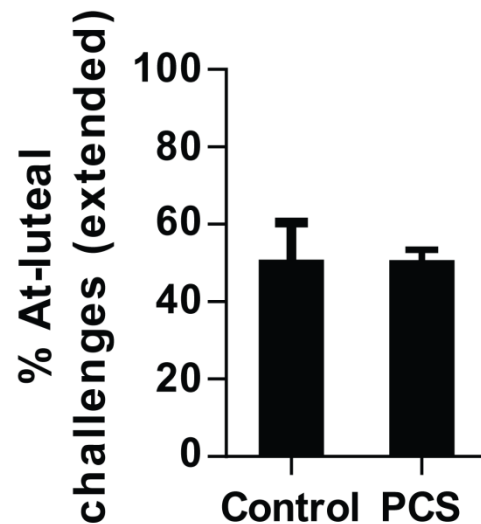

**Fig. S2 Menstrual phase distributions of SIV challenges.** Data were based on the extended (thirteen) challenges

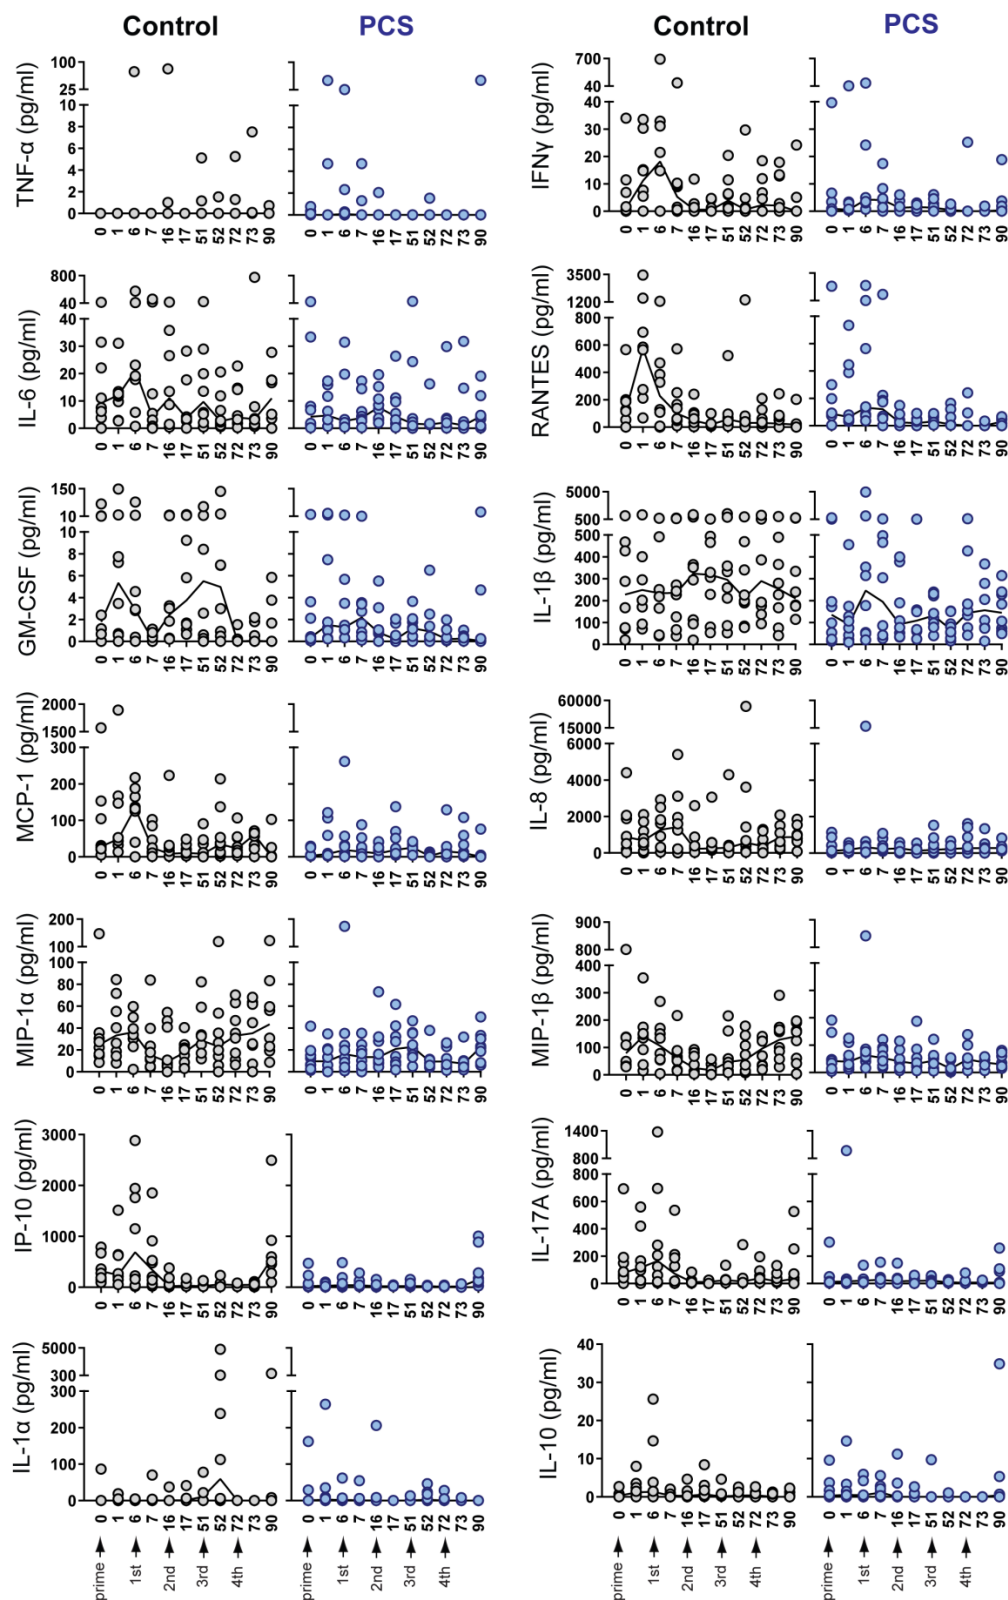

**Fig. S3 Dynamics of inflammatory cytokines in cervicovaginal secretions.** Cervicovaginal lavage (CVL) samples from the vaccination experiments illustrated in Fig. 1b were quantified by a Bio-Plex multiplexed cytokine assay, at indicated time points. Data are shown as values from individual animals with median line connection.

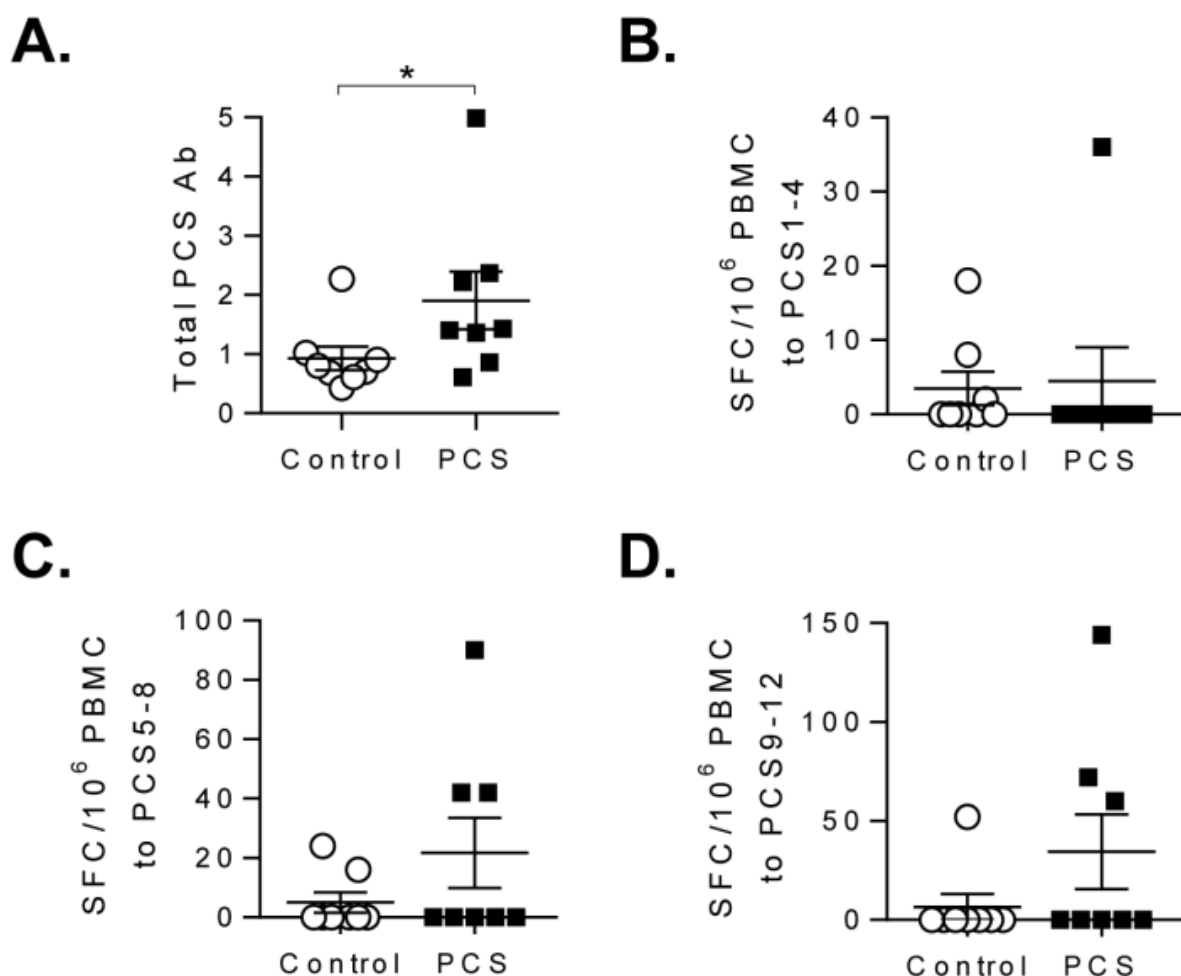

**Figure S4. The PCS vaccine induced anti-PCS antibody and IFN- $\gamma$  ELISPOT responses.** (A). Plasma total anti-PCS antibodies at week 73 (peak time point). \* $p < 0.05$  (Mann-Whitney's test). (B-D). Cellular antigen recall responses to PCS subset peptide pools in PBMCs isolated at week 73 were measured by IFN- $\gamma$  ELISPOT assays. SFC, spot-forming cells. All data are presented as values from individual animals with mean  $\pm$  SEM.

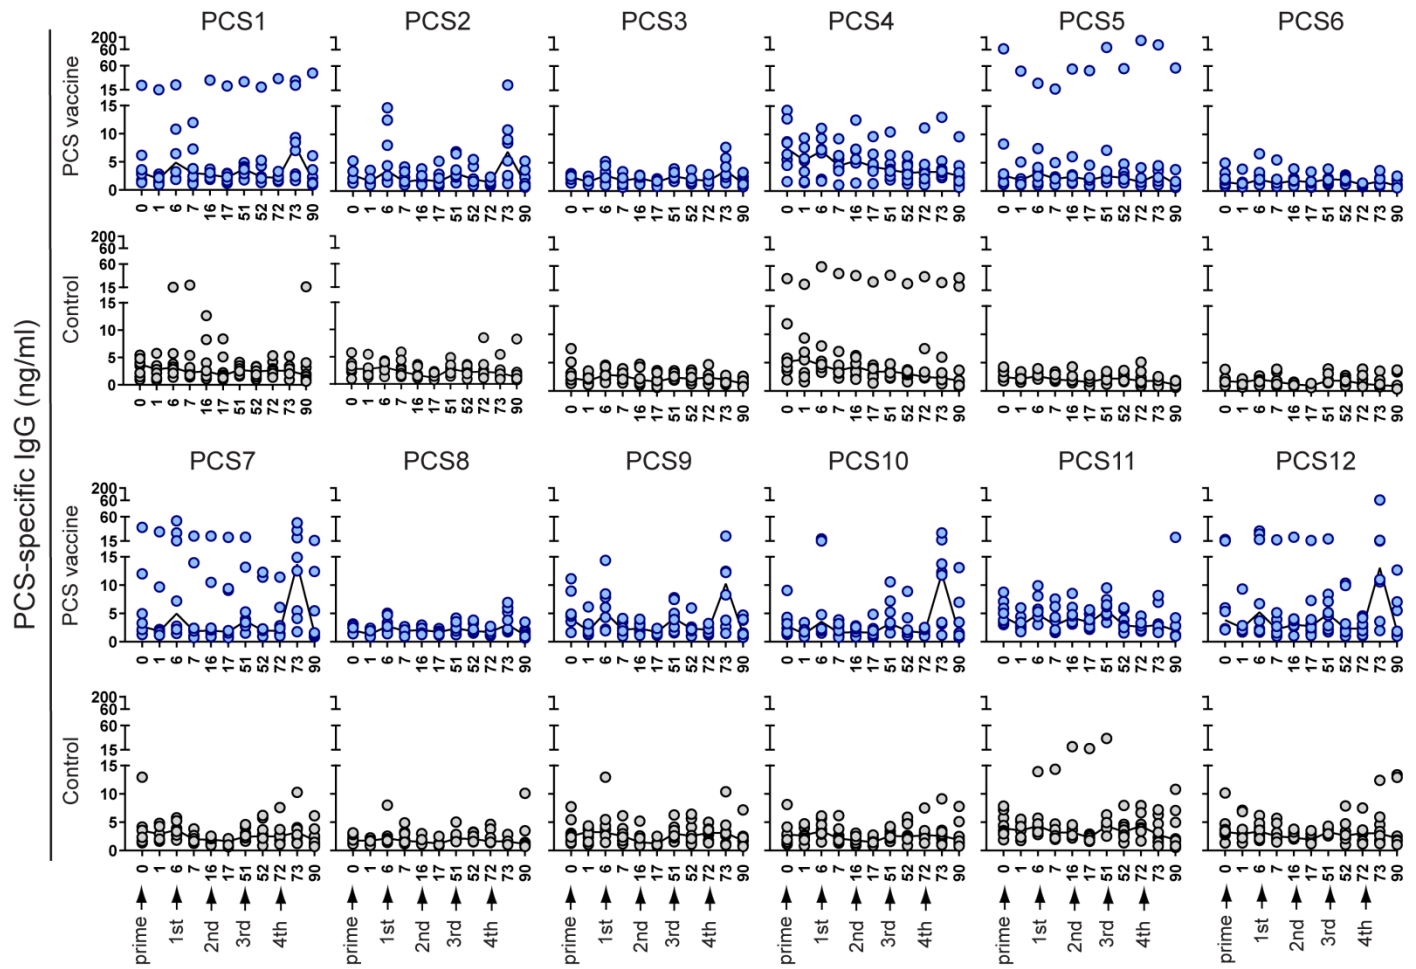

**Fig. S5 Dynamics of plasma IgG antibodies to PCS peptide antigens.** Plasma samples from the vaccination experiments illustrated in Fig. 1b were quantified for antibodies to each PCS peptide by a Bio-Plex multiplexed antibody assay, at indicated time points. Data are shown as values from individual animals with median line connection.

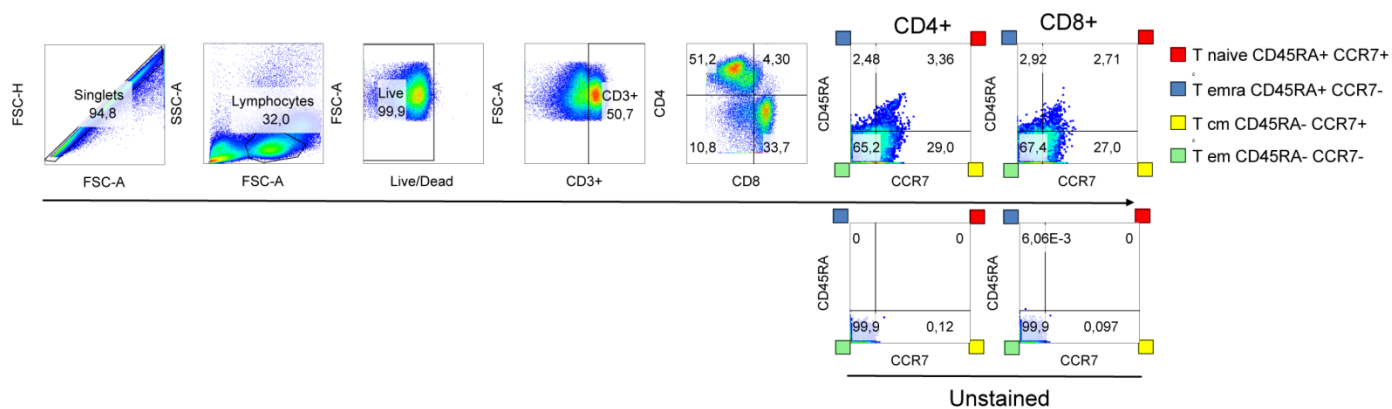

**Fig. S6** Representative of gating strategy in defining T cell subsets.

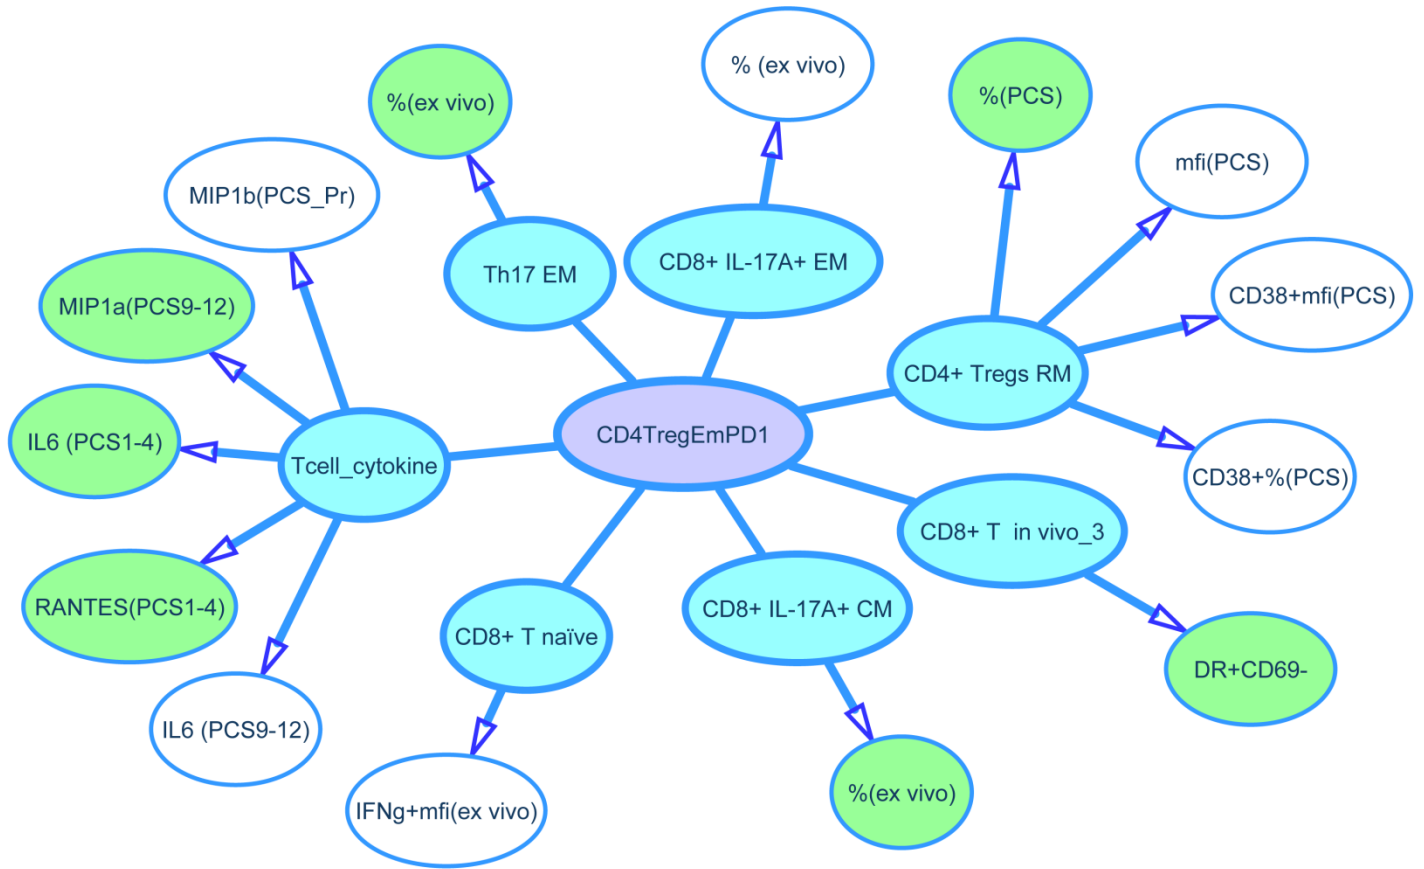

**Figure S7 Correlations of immune factors in relation to CD4TregEmPD1.** Different T cell subsets are in blue colored circles. Uncolored circles represent either frequency or expression intensity of immune activation or cytokine markers either under ex vivo conditions or after stimulated with PCS peptides. Green colored circles indicate variants that positively correlated with vaccine efficacy by Spearman rank analysis.



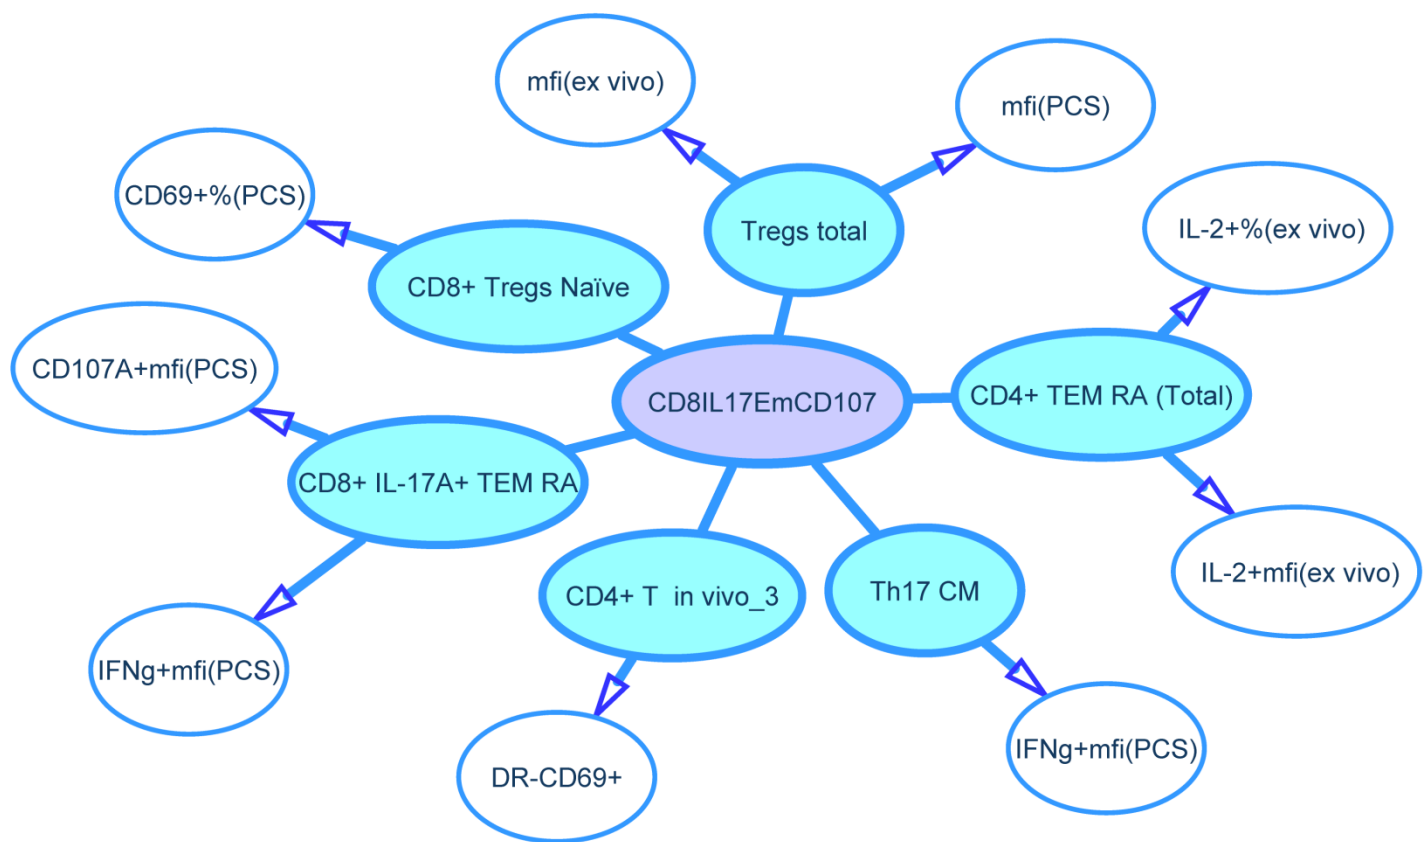

**Figure S8. Correlations of immune factors in relation to CD8IL17EmCD107.** Different T cell subsets are in blue colored circles. Uncolored circles represent either frequency or expression intensity of immune activation or cytokine markers either under ex vivo conditions or after stimulated with PCS peptides. Green colored circles indicate variants that positively correlated with vaccine efficacy by Spearman rank analysis.

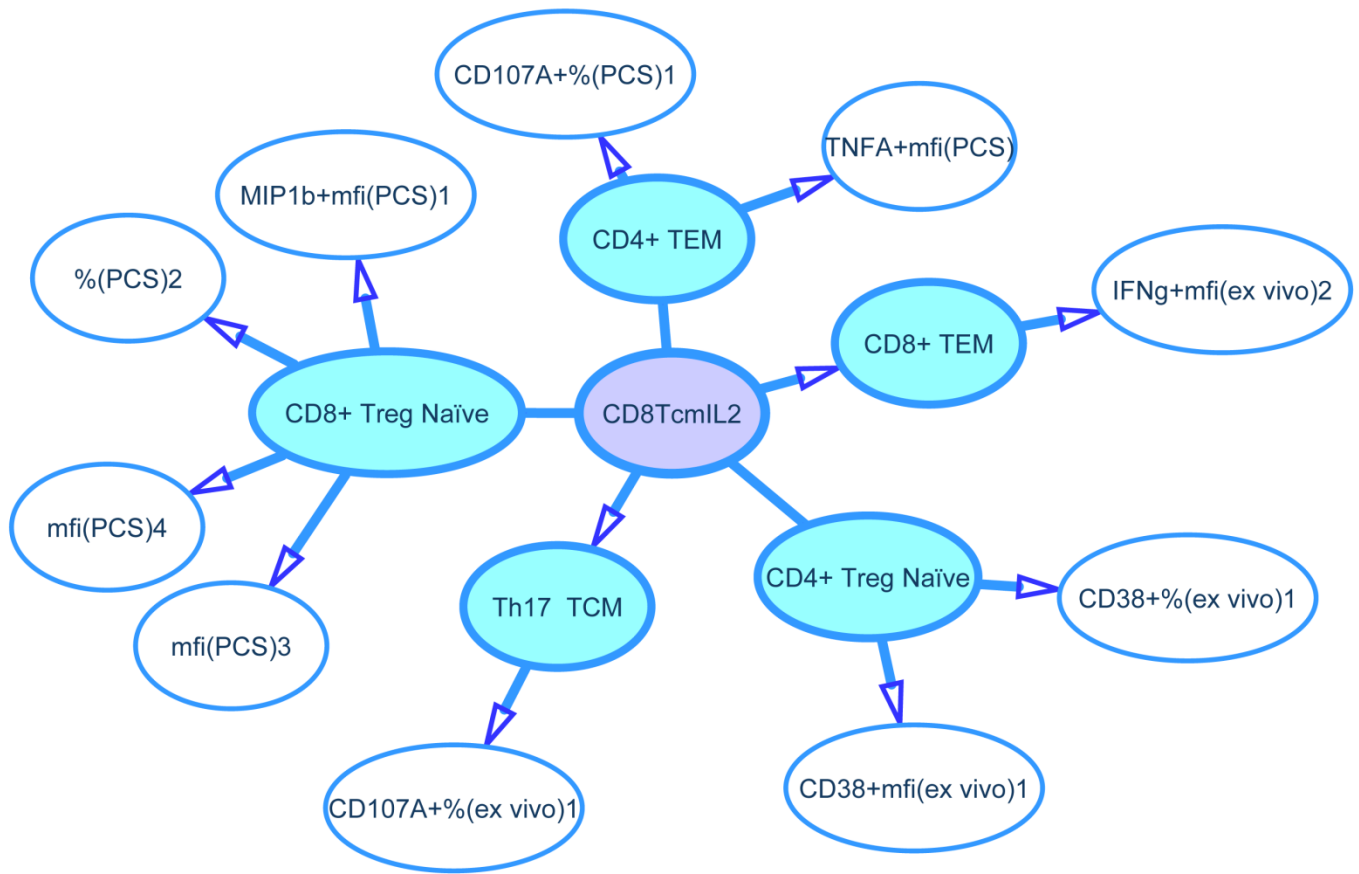

**Figure S9. Correlations of immune factors in relation to CD8TcmIL2.** Different T cell subsets are in blue colored circles. Uncolored circles represent either frequency or expression intensity of immune activation or cytokine markers either under ex vivo conditions or after stimulated with PCS peptides. Green colored circles indicate variants that positively correlated with vaccine efficacy by Spearman rank analysis.

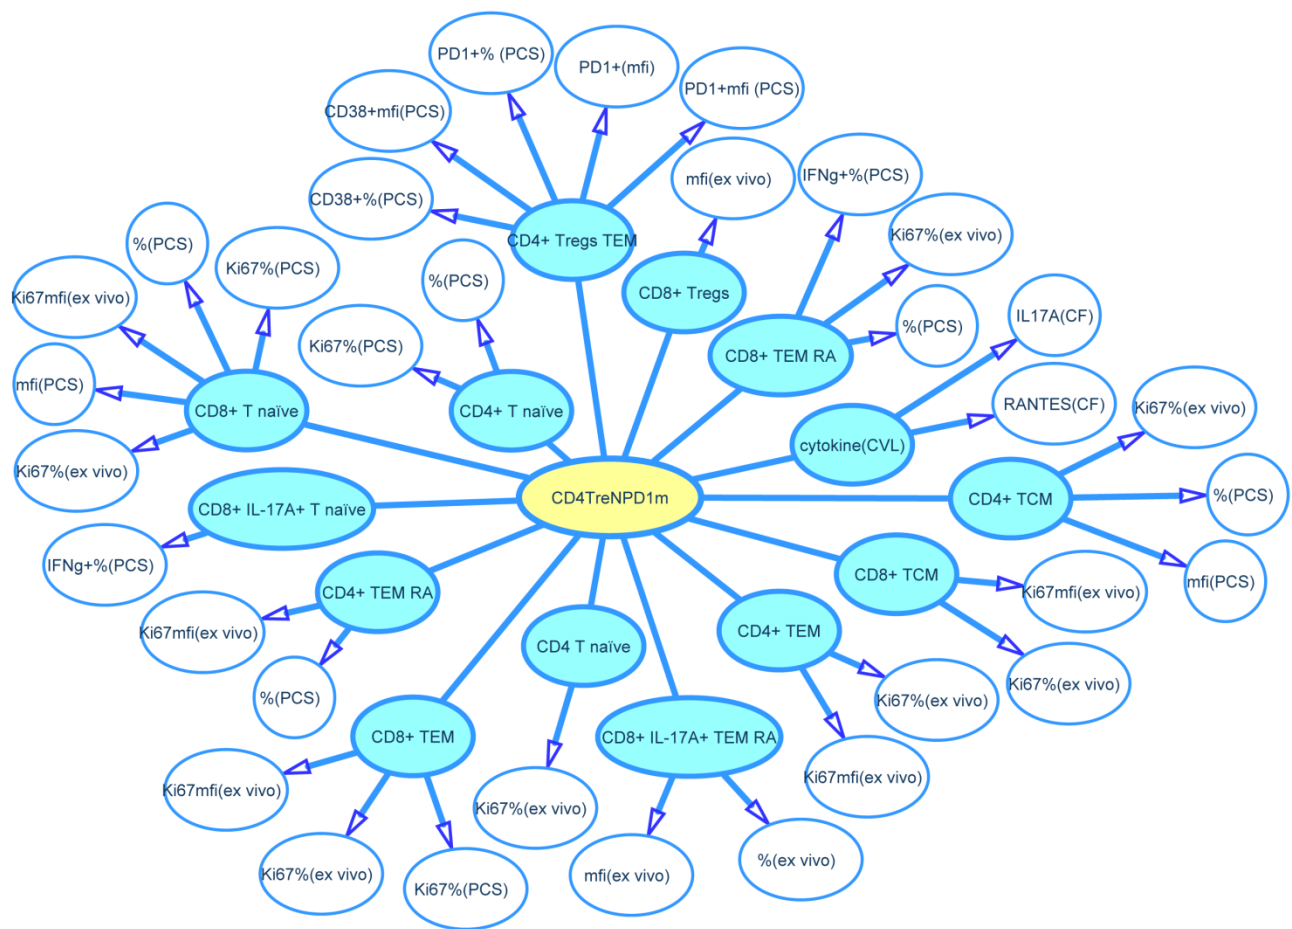

**Figure S10. Correlations of immune factors in relation to CD4TreNPD1m.** Different T cell subsets are in blue colored circles. Uncolored circles represent either frequency or expression intensity of immune activation or cytokine markers either under ex vivo conditions or after stimulated with PCS peptides. Green colored circles indicate variants that positively correlated with vaccine efficacy by Spearman rank analysis.



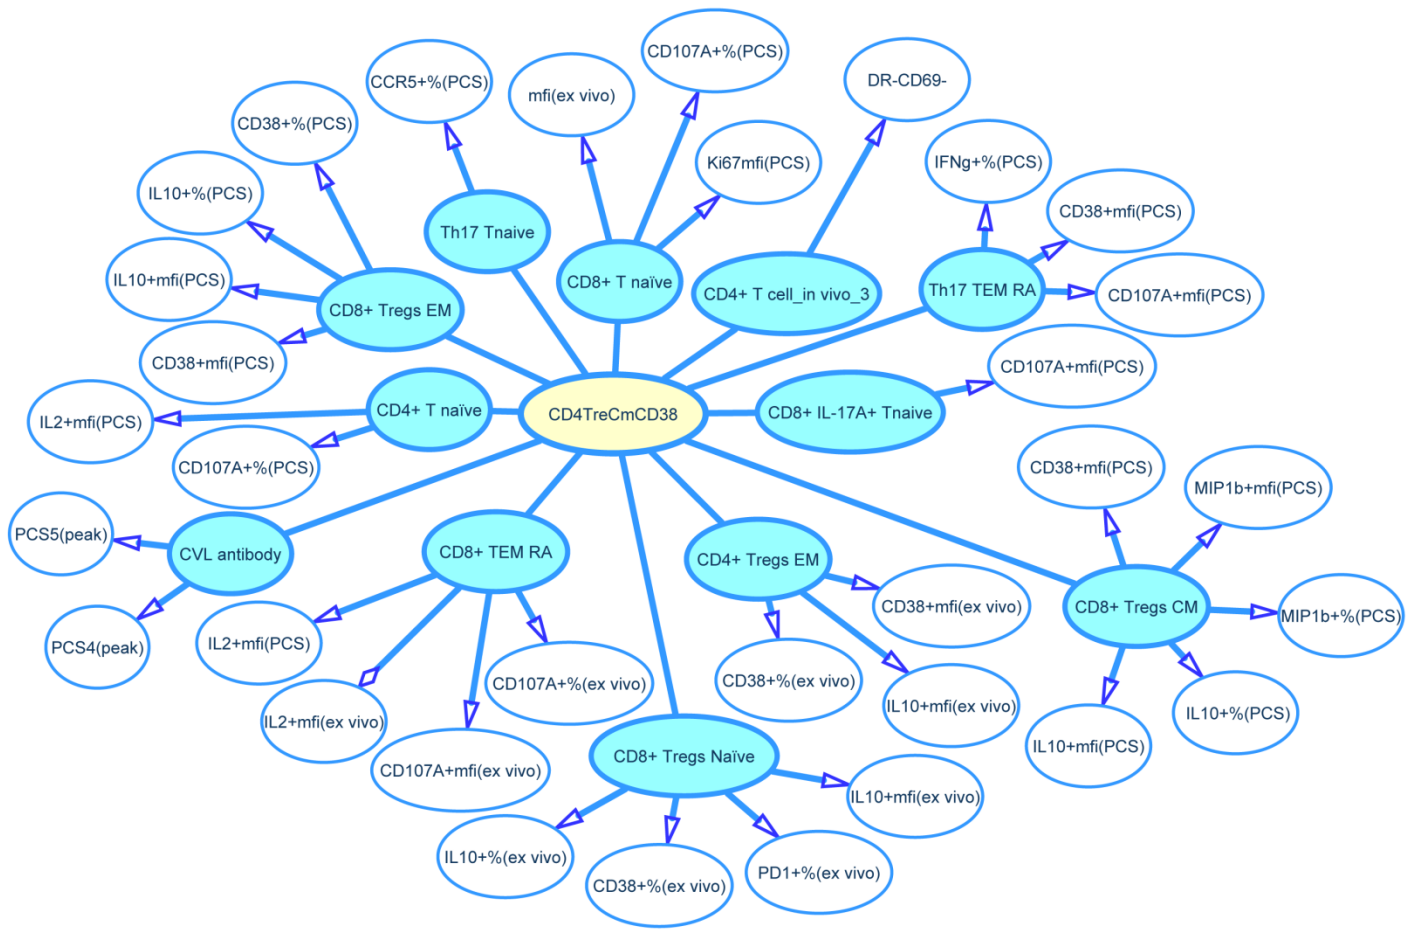

**Figure S12. Correlations of immune factors in relation to CD4TreCmCD38.** Different T cell subsets are in blue colored circles. Uncolored circles represent either frequency or expression intensity of immune activation or cytokine markers either under ex vivo conditions or after stimulated with PCS peptides. Green colored circles indicate variants that positively correlated with vaccine efficacy by Spearman rank analysis

**Table S1 Animal characteristics**

| <b>Group</b> | <b>Animal ID</b> | <b>Gender</b> | <b>Age (yrs)</b> | <b>Weight (kgs)</b> | <b>MHC class I</b> | <b>MHC class II</b> |
|--------------|------------------|---------------|------------------|---------------------|--------------------|---------------------|
| Control      | cy0774           | Female        | 6                | 4.9                 | M1/M4              | M1/M4               |
| Control      | cy0775           | Female        | 6                | 4.45                | M1/M3              | M1/M3               |
| Control      | cy0776           | Female        | 6                | 3.5                 | M1/M2/1            | M1/M1               |
| Control      | cy0777           | Female        | 6                | 3.25                | M1/M1              | M1/M1               |
| Control      | cy0778           | Female        | 6                | 4.35                | M1/M2/1            | M1/M3               |
| Control      | cy0779           | Female        | 6                | 3.5                 | M3/M6              | M2/M6/4/7           |
| Control      | cy0780           | Female        | 6                | 3.9                 | M2/M2/1            | M2/M1               |
| Control      | cy0781           | Female        | 6                | 4.75                | M4/6/M4            | M4/6/M4             |
| PCS          | cy0758           | Female        | 6                | 6.65                | M6/M3/2            | M6/M2               |
| PCS          | cy0759           | Female        | 7                | 4.1                 | M1/M4              | M1/M4               |
| PCS          | cy0760           | Female        | 5                | 5.85                | M1/M1              | M1/M1               |
| PCS          | cy0761           | Female        | 6                | 5.15                | M4/M7              | M4/M7               |
| PCS          | cy0762           | Female        | 7                | 4.25                | M3/M4/2            | M3/M2               |
| PCS          | cy0763           | Female        | 7                | 4.3                 | M1/M3              | M1/M3               |
| PCS          | cy0764           | Female        | 6                | 7                   | M1/M4              | M1/M4               |
| PCS          | cy0765           | Female        | 6                | 3.9                 | M3/M1              | M3/M2               |

**Table S2 MHC class I and II haplotype distributions between the control and the PCS vaccine groups**

| MHC I<br>haplotype | No. of monkeys |     | P value <sup>a</sup> | MHC II<br>haplotype | No. of monkeys |     | P value <sup>a</sup> |
|--------------------|----------------|-----|----------------------|---------------------|----------------|-----|----------------------|
|                    | Control        | PCS |                      |                     | Control        | PCS |                      |
| M1                 | 5              | 5   |                      | M1                  | 6              | 4   |                      |
| Non-M1             | 3              | 3   | 1.0000               | Non-M1              | 2              | 4   | 0.6084               |
| M2                 | 0              | 0   |                      | M2                  | 2              | 3   |                      |
| Non-M2             | 8              | 8   | 1.0000               | Non-M2              | 6              | 5   | 1.0000               |
| M3                 | 2              | 3   |                      | M3                  | 2              | 3   |                      |
| Non-M3             | 6              | 5   | 1.0000               | Non-M3              | 6              | 5   | 1.0000               |
| M4                 | 2              | 3   |                      | M4                  | 2              | 3   |                      |
| Non-M4             | 6              | 5   | 1.0000               | Non-M4              | 6              | 5   | 1.0000               |
| M5                 | 0              | 0   |                      | M5                  | 0              | 0   |                      |
| Non-M5             | 8              | 8   | 1.0000               | Non-M5              | 8              | 8   | 1.0000               |
| M6                 | 1              | 1   |                      | M6                  | 0              | 1   |                      |
| Non-M6             | 7              | 7   | 1.0000               | Non-M6              | 8              | 7   | 1.0000               |
| M7                 | 0              | 1   |                      | M7                  | 0              | 1   |                      |
| Non-M7             | 8              | 7   | 1.0000               | Non-M7              | 8              | 7   | 1.0000               |

a. Fisher's exact test.

Table S3 Kinetics of SIV acquisition

|         |        | Number of challenges (underlined) or days needed to acquire infection |   |          |    |          |    |          |    |          |    |          |    |          |    |          |    |          |    |           |    |           |    |           |     |           |     |     |     |     |     |     |     |     |     |     |     |     |     |     |     |   |   |   |   |   |  |  |  |
|---------|--------|-----------------------------------------------------------------------|---|----------|----|----------|----|----------|----|----------|----|----------|----|----------|----|----------|----|----------|----|-----------|----|-----------|----|-----------|-----|-----------|-----|-----|-----|-----|-----|-----|-----|-----|-----|-----|-----|-----|-----|-----|-----|---|---|---|---|---|--|--|--|
| Group   | Animal | <u>1</u>                                                              |   | <u>2</u> |    | <u>3</u> |    | <u>4</u> |    | <u>5</u> |    | <u>6</u> |    | <u>7</u> |    | <u>8</u> |    | <u>9</u> |    | <u>10</u> |    | <u>11</u> |    | <u>12</u> |     | <u>13</u> |     |     |     |     |     |     |     |     |     |     |     |     |     |     |     |   |   |   |   |   |  |  |  |
|         |        | 0                                                                     | 6 | 10       | 14 | 20       | 24 | 28       | 34 | 38       | 42 | 48       | 52 | 56       | 62 | 66       | 70 | 76       | 80 | 84        | 90 | 94        | 98 | 104       | 108 | 112       | 118 | 122 | 126 | 132 | 136 | 140 | 146 | 150 | 154 | 160 | 164 | 168 | 174 | 178 | 182 |   |   |   |   |   |  |  |  |
| Control | cy0774 | ○                                                                     | ○ | ○        | ○  | ○        | ○  | ●        |    |          |    |          |    |          |    |          |    |          |    |           |    |           |    |           |     |           |     |     |     |     |     |     |     |     |     |     |     |     |     |     |     |   |   |   |   |   |  |  |  |
| Control | cy0775 | ○                                                                     | ○ | ○        | ○  | ●        |    |          |    |          |    |          |    |          |    |          |    |          |    |           |    |           |    |           |     |           |     |     |     |     |     |     |     |     |     |     |     |     |     |     |     |   |   |   |   |   |  |  |  |
| Control | cy0776 | ○                                                                     | ● |          |    |          |    |          |    |          |    |          |    |          |    |          |    |          |    |           |    |           |    |           |     |           |     |     |     |     |     |     |     |     |     |     |     |     |     |     |     |   |   |   |   |   |  |  |  |
| Control | cy0777 | ○                                                                     | ○ | ○        | ○  | ○        | ○  | ○        | ○  | ○        | ○  | ○        | ○  | ○        | ○  | ○        | ○  | ○        | ○  | ○         | ○  | ○         | ○  | ○         | ○   | ○         | ○   | ○   | ○   | ○   | ○   | ○   | ○   | ○   | ○   | ○   | ○   | ○   | ○   | ○   | ○   | ○ | ○ | ○ |   |   |  |  |  |
| Control | cy0778 | ○                                                                     | ○ | ○        | ○  | ○        | ○  | ○        | ○  | ○        | ○  | ○        | ○  | ○        | ○  | ○        | ○  | ○        | ○  | ○         | ○  | ○         | ○  | ○         | ○   | ○         | ○   | ○   | ○   | ○   | ○   | ○   | ○   | ○   | ○   | ○   | ○   | ○   | ○   | ○   | ○   | ○ | ○ | ○ |   |   |  |  |  |
| Control | cy0779 | ○                                                                     | ○ | ○        | ○  | ○        | ○  | ○        | ○  | ○        | ○  | ○        | ○  | ○        | ○  | ○        | ○  | ○        | ○  | ○         | ○  | ○         | ○  | ○         | ○   | ○         | ○   | ○   | ○   | ○   | ○   | ○   | ○   | ○   | ○   | ○   | ○   | ○   | ○   | ○   | ○   | ○ | ○ | ○ | ○ |   |  |  |  |
| Control | cy0780 | ○                                                                     | ○ | ○        | ○  | ○        | ○  | ○        | ○  | ○        | ○  | ○        | ○  | ○        |    |          |    |          |    |           |    |           |    |           |     |           |     |     |     |     |     |     |     |     |     |     |     |     |     |     |     |   |   |   |   |   |  |  |  |
| Control | cy0781 | ○                                                                     | ○ | ○        | ○  | ●        |    |          |    |          |    |          |    |          |    |          |    |          |    |           |    |           |    |           |     |           |     |     |     |     |     |     |     |     |     |     |     |     |     |     |     |   |   |   |   |   |  |  |  |
| PCS     | cy0758 | ○                                                                     | ○ | ○        | ○  | ○        | ○  | ○        | ○  | ○        | ○  | ○        | ○  | ○        | ○  | ○        | ○  | ○        | ○  | ○         | ○  | ○         | ○  | ○         | ○   | ○         | ○   | ○   | ○   | ○   | ○   | ○   | ○   | ○   | ○   | ○   | ○   | ○   | ○   | ○   | ○   | ○ | ○ | ○ |   |   |  |  |  |
| PCS     | cy0759 | ○                                                                     | ○ | ○        | ○  | ○        | ○  | ○        | ○  | ○        | ○  | ○        | ○  | ○        | ○  | ○        | ○  | ○        | ○  | ○         | ○  | ○         | ○  | ○         | ○   | ○         | ○   | ○   | ○   | ○   | ○   | ○   | ○   | ○   | ○   | ○   | ○   | ○   | ○   | ○   | ○   | ○ | ○ | ○ | ○ |   |  |  |  |
| PCS     | cy0760 | ○                                                                     | ○ | ○        | ○  | ○        | ○  | ○        | ○  | ○        | ○  | ○        | ○  | ○        | ○  | ○        | ○  | ○        | ○  | ○         | ○  | ○         | ○  | ○         | ○   | ○         | ○   | ○   | ○   | ○   | ○   | ○   | ○   | ○   | ○   | ○   | ○   | ○   | ○   | ○   | ○   | ○ | ○ | ○ | ○ | ○ |  |  |  |
| PCS     | cy0761 | ○                                                                     | ○ | ○        | ○  | ○        | ○  | ○        | ○  | ○        | ○  | ○        | ○  | ○        | ○  | ○        | ○  | ○        | ○  | ○         | ○  | ○         | ○  | ○         | ○   | ○         | ○   | ○   | ○   | ○   | ○   | ○   | ○   | ○   | ○   | ○   | ○   | ○   | ○   | ○   | ○   | ○ | ○ | ○ | ○ | ○ |  |  |  |
| PCS     | cy0762 | ○                                                                     | ○ | ○        | ○  | ○        | ○  | ○        | ○  | ○        | ○  | ○        | ○  | ○        | ○  | ○        | ○  | ○        | ○  | ○         | ○  | ○         | ○  | ○         | ○   | ○         | ○   | ○   | ○   | ○   | ○   | ○   | ○   | ○   | ○   | ○   | ○   | ○   | ○   | ○   | ○   | ○ | ○ | ○ | ○ | ○ |  |  |  |
| PCS     | cy0763 | ○                                                                     | ○ | ○        | ○  | ○        | ○  | ○        | ○  | ○        | ○  | ○        | ○  | ○        | ○  | ○        | ○  | ○        | ○  | ○         | ○  | ○         | ○  | ○         | ○   | ○         | ○   | ○   | ○   | ○   | ○   | ○   | ○   | ○   | ○   | ○   | ○   | ○   | ○   | ○   | ○   | ○ | ○ | ○ | ○ | ○ |  |  |  |
| PCS     | cy0764 | ○                                                                     | ○ | ○        | ○  | ○        | ○  | ○        | ○  | ○        | ○  | ○        | ○  | ○        | ○  | ○        | ○  | ○        | ○  | ○         | ○  | ○         | ○  | ○         | ○   | ○         | ○   | ○   | ○   | ○   | ○   | ○   | ○   | ○   | ○   | ○   | ○   | ○   | ○   | ○   | ○   | ○ | ○ | ○ | ○ | ○ |  |  |  |
| PCS     | cy0765 | ○                                                                     | ○ | ○        | ○  | ○        | ○  | ○        | ○  | ○        | ○  | ○        | ○  | ○        | ○  | ○        | ○  | ○        | ○  | ○         | ○  | ○         | ○  | ○         | ○   | ○         | ○   | ○   | ○   | ○   | ○   | ○   | ○   | ○   | ○   | ○   | ○   | ○   | ○   | ○   | ○   | ○ | ○ | ○ | ○ | ○ |  |  |  |

Intravaginal SIVmac251 challenges were conducted every two weeks. Infection status was monitored on days 0, 6, 10 and 14 of each 14-day challenge round by determining plasma viral load. Numbers of challenges (underlined) or days relative to the time of the first challenge are indicated. For logistic reason, some animals were monitored on day 39 or 53 as labelled, one day later than originally designed. Empty circle: no detectable viral load. Solid circle: positive viral load.



**Table S4. MHC class I and II haplotype distributions between infected and uninfected animals (Standard challenges)**

| MHC I<br>haplotype | No. of monkeys |            | P value <sup>a</sup> | MHC II<br>haplotype | No. of monkeys |            | P value <sup>a</sup> |
|--------------------|----------------|------------|----------------------|---------------------|----------------|------------|----------------------|
|                    | Infected       | Uninfected |                      |                     | Infected       | Uninfected |                      |
| M1                 | 5              | 5          |                      | M1                  | 6              | 4          |                      |
| Non-M1             | 3              | 3          | 1.0000               | Non-M1              | 2              | 4          | 0.6084               |
| M2                 | 1              | 0          |                      | M2                  | 2              | 3          |                      |
| Non-M2             | 7              | 8          | 1.0000               | Non-M2              | 6              | 5          | 1.0000               |
| M3                 | 1              | 4          |                      | M3                  | 1              | 4          |                      |
| Non-M3             | 7              | 4          | 0.2821               | Non-M3              | 7              | 4          | 0.2821               |
| M4                 | 3              | 2          |                      | M4                  | 3              | 2          |                      |
| Non-M4             | 5              | 6          | 1.0000               | Non-M4              | 5              | 6          | 1.0000               |
| M5                 | 0              | 0          |                      | M5                  | 0              | 0          |                      |
| Non-M5             | 8              | 8          | 1.0000               | Non-M5              | 8              | 8          | 1.0000               |
| M6                 | 1              | 1          |                      | M6                  | 1              | 0          |                      |
| Non-M6             | 7              | 7          | 1.0000               | Non-M6              | 7              | 8          | 1.0000               |
| M7                 | 0              | 1          |                      | M7                  | 1              | 1          |                      |
| Non-M7             | 8              | 7          | 1.0000               | Non-M7              | 7              | 7          | 1.0000               |

a. Fisher's exact test.

**Table S5. MHC class I and II haplotype distributions between infected and uninfected animals (extended challenges)**

| MHC I<br>haplotype | No. of monkeys |            | P value <sup>a</sup> | MHC II<br>haplotype | No. of monkeys |            | P value <sup>a</sup> |
|--------------------|----------------|------------|----------------------|---------------------|----------------|------------|----------------------|
|                    | Infected       | Uninfected |                      |                     | Infected       | Uninfected |                      |
| M1                 | 7              | 3          |                      | M1                  | 7              | 3          |                      |
| Non-M1             | 4              | 2          | 1.0000               | Non-M1              | 4              | 2          | 1.0000               |
| M2                 | 1              | 0          |                      | M2                  | 4              | 1          |                      |
| Non-M2             | 10             | 5          | 1.0000               | Non-M2              | 7              | 4          | 1.0000               |
| M3                 | 3              | 2          |                      | M3                  | 3              | 2          |                      |
| Non-M3             | 8              | 3          | 1.0000               | Non-M3              | 8              | 3          | 1.0000               |
| M4                 | 4              | 1          |                      | M4                  | 4              | 1          |                      |
| Non-M4             | 7              | 4          | 1.0000               | Non-M4              | 7              | 4          | 1.0000               |
| M5                 | 0              | 0          |                      | M5                  | 0              | 0          |                      |
| Non-M5             | 11             | 5          | 1.0000               | Non-M5              | 11             | 5          | 1.0000               |
| M6                 | 1              | 1          |                      | M6                  | 1              | 0          |                      |
| Non-M6             | 10             | 4          | 1.0000               | Non-M6              | 10             | 5          | 1.0000               |
| M7                 | 0              | 1          |                      | M7                  | 0              | 1          |                      |
| Non-M7             | 11             | 4          | 0.3125               | Non-M7              | 11             | 4          | 0.3125               |

a. Fisher's exact test.

| Table S6 Anti-SIVmac251 neutralizing antibody titer in TZM.bl cells (1/x) |             |                             |      |                       |      |      |      |
|---------------------------------------------------------------------------|-------------|-----------------------------|------|-----------------------|------|------|------|
| Animal ID                                                                 | Group       | SIVmac251.TCLA.15 (Tier 1A) |      | SIVmac251.30 (Tier 2) |      | MuLV |      |
|                                                                           |             | ID50                        | ID80 | ID50                  | ID80 | ID50 | ID80 |
| cy0758                                                                    | PCS vaccine | <20                         | <20  | <20                   | <20  | <20  | <20  |
| cy0759                                                                    | PCS vaccine | <20                         | <20  | <20                   | <20  | <20  | <20  |
| cy0760                                                                    | PCS vaccine | <20                         | <20  | <20                   | <20  | <20  | <20  |
| cy0761                                                                    | PCS vaccine | <20                         | <20  | <20                   | <20  | <20  | <20  |
| cy0762                                                                    | PCS vaccine | <20                         | <20  | <20                   | <20  | <20  | <20  |
| cy0763                                                                    | PCS vaccine | <20                         | <20  | <20                   | <20  | <20  | <20  |
| cy0764                                                                    | PCS vaccine | <20                         | <20  | <20                   | <20  | <20  | <20  |
| cy0765                                                                    | PCS vaccine | <20                         | <20  | <20                   | <20  | <20  | <20  |
| cy0774                                                                    | control     | <20                         | <20  | <20                   | <20  | <20  | <20  |
| cy0775                                                                    | control     | <20                         | <20  | <20                   | <20  | <20  | <20  |
| cy0776                                                                    | control     | <20                         | <20  | <20                   | <20  | <20  | <20  |
| cy0777                                                                    | control     | <20                         | <20  | <20                   | <20  | <20  | <20  |
| cy0778                                                                    | control     | <20                         | <20  | <20                   | <20  | <20  | <20  |
| cy0779                                                                    | control     | <20                         | <20  | <20                   | <20  | <20  | <20  |
| cy0780                                                                    | control     | <20                         | <20  | <20                   | <20  | <20  | <20  |
| cy0781                                                                    | control     | <20                         | <20  | <20                   | <20  | <20  | <20  |

**Table S7. Cytokine-producing antigen recall responses in PBMCs from the PCS vaccine group**

| Animal ID | Cytokines (pg/ml) secreted in response to PCS1-4  |               |       |          |        |              |       |        |                |               |       |        |        |               | No. of challenges to cause infection |
|-----------|---------------------------------------------------|---------------|-------|----------|--------|--------------|-------|--------|----------------|---------------|-------|--------|--------|---------------|--------------------------------------|
|           | TNF- $\alpha$                                     | IFN- $\gamma$ | IL-6  | RANTES   | GM-CSF | IL-1 $\beta$ | MCP-1 | IL-8   | MIP-1 $\alpha$ | MIP-1 $\beta$ | IL-10 | IP-10  | IL-17A | IL-1 $\alpha$ |                                      |
| cy0758    | 0.00                                              | 0.00          | 1.14  | 0.00     | 0.00   | 0.00         | 0.00  | 0.99   | 0.00           | 0.00          | 0.00  | 19.51  | 0.00   | 0.00          | 3                                    |
| cy0759    | 43.24                                             | 0.00          | 0.00  | 29.47    | 0.00   | 0.00         | 0.00  | 0.00   | 0.00           | 0.00          | 0.00  | 0.00   | 0.00   | 0.00          | 13                                   |
| cy0760    | 0.00                                              | 4.84          | 3.53  | 219.59   | 0.00   | 0.00         | 0.00  | 33.47  | 0.00           | 106.80        | 1.34  | 237.04 | 0.00   | 0.00          | Uninfected                           |
| cy0761    | 0.00                                              | 0.00          | 4.44  | 943.24   | 0.00   | 0.00         | 0.00  | 0.35   | 0.00           | 0.00          | 0.00  | 0.00   | 0.00   | 0.00          | Uninfected                           |
| cy0762    | 0.00                                              | 0.00          | 0.00  | 47.85    | 0.00   | 0.00         | 0.00  | 0.00   | 0.00           | 0.00          | 0.00  | 0.00   | 0.00   | 0.00          | 9                                    |
| cy0763    | 0.00                                              | 1.13          | 22.40 | 2,498.02 | 0.00   | 0.00         | 0.00  | 8.53   | 0.00           | 563.57        | 0.00  | 0.00   | 0.00   | 0.00          | Uninfected                           |
| cy0764    | 0.00                                              | 0.00          | 0.00  | 0.00     | 0.00   | 0.00         | 0.00  | 2.37   | 0.00           | 377.49        | 0.00  | 0.00   | 0.00   | 0.00          | 2                                    |
| cy0765    | 0.00                                              | 0.00          | 0.00  | 0.00     | 19.28  | 0.00         | 0.00  | 285.19 | 0.00           | 0.00          | 0.00  | 179.60 | 0.00   | 0.00          | 11                                   |
| Animal ID | Cytokines (pg/ml) secreted in response to PCS5-8  |               |       |          |        |              |       |        |                |               |       |        |        |               | No. of challenges to cause infection |
|           | TNF- $\alpha$                                     | IFN- $\gamma$ | IL-6  | RANTES   | GM-CSF | IL-1 $\beta$ | MCP-1 | IL-8   | MIP-1 $\alpha$ | MIP-1 $\beta$ | IL-10 | IP-10  | IL-17A | IL-1 $\alpha$ |                                      |
| cy0758    | 1.11                                              | 1.28          | 0.00  | 0.00     | 0.00   | 0.00         | 0.00  | 90.75  | 0.00           | 0.00          | 0.96  | 0.00   | 0.00   | 0.00          | 3                                    |
| cy0759    | 55.13                                             | 0.00          | 0.00  | 0.00     | 0.00   | 0.00         | 0.00  | 0.00   | 0.00           | 0.00          | 0.00  | 0.00   | 0.00   | 0.00          | 13                                   |
| cy0760    | 122.64                                            | 6.62          | 6.30  | 573.69   | 14.18  | 0.00         | 0.00  | 366.19 | 0.00           | 201.33        | 0.91  | 323.34 | 0.00   | 0.00          | Uninfected                           |
| cy0761    | 0.00                                              | 0.00          | 23.61 | 171.75   | 0.00   | 0.59         | 28.52 | 408.20 | 0.00           | 0.00          | 0.00  | 0.00   | 0.00   | 156.99        | Uninfected                           |
| cy0762    | 12.36                                             | 14.15         | 16.79 | 326.20   | 9.24   | 3.85         | 0.00  | 49.05  | 20.63          | 0.00          | 0.00  | 0.00   | 168.14 | 15.61         | 9                                    |
| cy0763    | 3.68                                              | 0.00          | 0.00  | 0.00     | 0.00   | 0.00         | 0.00  | 38.83  | 25.04          | 344.06        | 0.00  | 0.00   | 0.00   | 0.00          | Uninfected                           |
| cy0764    | 25.73                                             | 0.00          | 0.00  | 0.00     | 0.00   | 0.00         | 0.00  | 165.60 | 0.00           | 465.20        | 0.00  | 0.00   | 0.00   | 0.00          | 2                                    |
| cy0765    | 0.00                                              | 0.00          | 0.00  | 0.00     | 0.00   | 0.00         | 0.00  | 0.00   | 0.00           | 662.24        | 0.00  | 152.72 | 0.00   | 818.28        | 11                                   |
| Animal ID | Cytokines (pg/ml) secreted in response to PCS9-12 |               |       |          |        |              |       |        |                |               |       |        |        |               | No. of challenges to cause infection |
|           | TNF- $\alpha$                                     | IFN- $\gamma$ | IL-6  | RANTES   | GM-CSF | IL-1 $\beta$ | MCP-1 | IL-8   | MIP-1 $\alpha$ | MIP-1 $\beta$ | IL-10 | IP-10  | IL-17A | IL-1 $\alpha$ |                                      |
| cy0758    | 0.00                                              | 0.80          | 0.00  | 0.00     | 0.00   | 0.00         | 0.00  | 0.00   | 0.00           | 0.00          | 0.00  | 0.00   | 0.00   | 0.00          | 3                                    |
| cy0759    | 0.00                                              | 0.00          | 0.00  | 0.00     | 0.00   | 0.00         | 0.00  | 0.00   | 0.00           | 0.00          | 0.00  | 0.00   | 0.00   | 0.00          | 13                                   |
| cy0760    | 0.00                                              | 1.02          | 47.45 | 365.24   | 0.00   | 6.90         | 62.93 | 238.46 | 56.57          | 261.44        | 0.00  | 249.40 | 0.00   | 101.05        | Uninfected                           |
| cy0761    | 0.00                                              | 0.00          | 69.48 | 205.04   | 0.00   | 7.75         | 0.00  | 76.23  | 83.67          | 312.05        | 0.00  | 0.00   | 0.00   | 0.00          | Uninfected                           |
| cy0762    | 0.00                                              | 22.46         | 14.56 | 340.55   | 15.59  | 1.51         | 0.00  | 203.23 | 1.20           | 0.00          | 8.14  | 0.00   | 142.50 | 0.00          | 9                                    |
| cy0763    | 28.54                                             | 0.00          | 12.18 | 66.59    | 0.00   | 0.00         | 0.00  | 89.41  | 33.11          | 765.01        | 0.00  | 71.05  | 0.00   | 0.00          | Uninfected                           |
| cy0764    | 19.58                                             | 0.00          | 0.00  | 0.00     | 0.00   | 0.00         | 0.00  | 0.00   | 0.00           | 126.15        | 0.00  | 0.00   | 0.00   | 0.00          | 2                                    |
| cy0765    | 128.23                                            | 0.00          | 0.00  | 0.00     | 0.00   | 0.00         | 0.00  | 0.00   | 0.00           | 773.93        | 0.00  | 143.01 | 0.00   | 69.52         | 11                                   |

PBMCs collected at the peak time point (week 73) were stimulated with a pool of SIV peptides (PCS1-4, PCS5-8 or PCS9-12) and quantified for cytokine secretions by Bio-Plex multiplexed cytokine assay. Number of challenges to cause infection in each animal is also listed. The values of medium only negative control were subtracted.

Table S8 Immune correlates of risk (CoRs) (p value not corrected for multiple comparison)

| Immune response                     |                                            |                      |                        | Correlation with No. of challenges (Spearman rank) |        |
|-------------------------------------|--------------------------------------------|----------------------|------------------------|----------------------------------------------------|--------|
| Type                                | Sub-type                                   | Ag                   | Time point             | Rho (r)                                            | p      |
| CVL mucosal cytokine                | IL-1 α fold change                         | N/A                  | Peak/baseline          | -0.6584                                            | 0.0056 |
| CVL mucosal cytokine                | IL-1 α fold change                         | N/A                  | Pre-challenge/baseline | -0.5435                                            | 0.0296 |
| CVL mucosal cytokine                | IL-1 α                                     | N/A                  | Pre-challenge          | -0.5168                                            | 0.0404 |
| CVL mucosal IgG Ab                  | N/A                                        | PCS1 peptide         | Peak                   | -0.7075                                            | 0.0496 |
| CVL mucosal IgG Ab                  | N/A                                        | PCS3 peptide         | Peak                   | -0.7075                                            | 0.0496 |
| CVL mucosal IgG Ab                  | N/A                                        | PCS4 peptide         | Peak                   | -0.7075                                            | 0.0496 |
| CVL mucosal IgG Ab                  | N/A                                        | PCS5 peptide         | Peak                   | -0.7807                                            | 0.0222 |
| CVL mucosal IgG Ab                  | N/A                                        | PCS9 peptide         | Peak                   | -0.7075                                            | 0.0496 |
| CD8+ T cells (ex vivo)              | CCR7+CD45RA+% of CD8+                      | N/A                  | Pre-challenge          | -0.8000                                            | 0.0171 |
| CD4+CD25+FoxP3+ T cells (ex vivo)   | CD38+% of CD4+CD25+FoxP3+CD45RA-CD127-     | N/A                  | Pre-challenge          | -0.8106                                            | 0.0147 |
| CD4+CD25+FoxP3+ T cells (ex vivo)   | CD38 MFI of CD4+CD25+FoxP3+CD45RA-CD127-   | N/A                  | Pre-challenge          | -0.8944                                            | 0.0027 |
| CD8+CD25+FoxP3+ T cells (ex vivo)   | CD127 MFI of CD8+CD25+FoxP3+CD45RA+        | N/A                  | Pre-challenge          | -0.7563                                            | 0.0299 |
| CD8+CD25+FoxP3+ T cells (ex vivo)   | CD38+% of CD8+CD25+FoxP3+CD45RA+CD127+     | N/A                  | Pre-challenge          | -0.8665                                            | 0.0054 |
| CD8+CD25+FoxP3+ T cells (ex vivo)   | CD38 MFI of CD8+CD25+FoxP3+CD45RA+CD127+   | N/A                  | Pre-challenge          | -0.8665                                            | 0.0054 |
| CD8+CD25+FoxP3+ T cells (ex vivo)   | IL-10+% of CD8+CD25+FoxP3+CD45RA+CD127+    | N/A                  | Pre-challenge          | -0.8106                                            | 0.0147 |
| CD8+CD25+FoxP3+ T cells (ex vivo)   | IL-10 MFI of CD8+CD25+FoxP3+CD45RA+CD127+  | N/A                  | Pre-challenge          | -0.8665                                            | 0.0054 |
| CD8+CD25+FoxP3+ T cells (ex vivo)   | MIP-1β+% of CD8+CD25+FoxP3+CD45RA+CD127+   | N/A                  | Pre-challenge          | -0.8113                                            | 0.0145 |
| CD8+CD25+FoxP3+ T cells (ex vivo)   | MIP-1β MFI of CD8+CD25+FoxP3+CD45RA+CD127+ | N/A                  | Pre-challenge          | -0.8318                                            | 0.0104 |
| CD8+CD25+FoxP3+ T cells (ex vivo)   | PD-1+% of CD8+CD25+FoxP3+CD45RA+CD127+     | N/A                  | Pre-challenge          | -0.8665                                            | 0.0054 |
| CD8+CD25+FoxP3+ T cells (ex vivo)   | PD-1 MFI of CD8+CD25+FoxP3+CD45RA+CD127+   | N/A                  | Pre-challenge          | -0.8106                                            | 0.0147 |
| CD4+IL17A+ T cells (Ag recall)      | CCR5+% of CD4+IL17A+CCR7+CD45RA+           | PCS1-12 peptide pool | Pre-challenge          | -0.7507                                            | 0.0319 |
| CD8+IL17A+ T cells (Ag recall)      | CCR5+% of CD8+IL17A+CCR7+CD45RA+           | PCS1-12 peptide pool | Pre-challenge          | -0.7278                                            | 0.0407 |
| CD8+IL17A+ T cells (Ag recall)      | CD69+% of CD8+IL17A+CCR7+CD45RA+           | PCS1-12 peptide pool | Pre-challenge          | -0.7278                                            | 0.0407 |
| CD8+IL17A+ T cells (Ag recall)      | CD69 MFI of CD8+IL17A+CCR7+CD45RA+         | PCS1-12 peptide pool | Pre-challenge          | -0.7278                                            | 0.0407 |
| CD8+IL17A+ T cells (Ag recall)      | CD107a MFI of CD8+IL17A+CCR7+CD45RA+       | PCS1-12 peptide pool | Pre-challenge          | -0.7507                                            | 0.0319 |
| CD8+IL17A+ T cells (Ag recall)      | IFN- γ MFI of CD8+IL17A+CCR7-CD45RA-       | PCS1-12 peptide pool | Pre-challenge          | -0.7507                                            | 0.0319 |
| CD4+CD25+FoxP3+ T cells (Ag recall) | MIP-1 β+% of CD4+CD25+FoxP3+CD45RA+CD127+  | PCS1-12 peptide pool | Pre-challenge          | -0.7507                                            | 0.0319 |
| CD4+CD25+FoxP3+ T cells (Ag recall) | CD38+% of CD4+CD25+FoxP3+CD45RA-CD127+     | PCS1-12 peptide pool | Pre-challenge          | -0.7507                                            | 0.0319 |
| CD4+CD25+FoxP3+ T cells (Ag recall) | CD38 MFI of CD4+CD25+FoxP3+CD45RA-CD127+   | PCS1-12 peptide pool | Pre-challenge          | -0.7826                                            | 0.0217 |
| CD8+CD25+FoxP3+ T cells (Ag recall) | CD38+% of CD8+CD25+FoxP3+CD45RA-CD127+     | PCS1-12 peptide pool | Pre-challenge          | -0.8665                                            | 0.0054 |
| CD8+CD25+FoxP3+ T cells (Ag recall) | CD38 MFI of CD8+CD25+FoxP3+CD45RA-CD127+   | PCS1-12 peptide pool | Pre-challenge          | -0.8106                                            | 0.0147 |
| CD8+CD25+FoxP3+ T cells (Ag recall) | IL-10 MFI of CD8+CD25+FoxP3+CD45RA-CD127+  | PCS1-12 peptide pool | Pre-challenge          | -0.7826                                            | 0.0217 |
| CD8+CD25+FoxP3+ T cells (Ag recall) | MIP-1β MFI of CD8+CD25+FoxP3+CD45RA-CD127+ | PCS1-12 peptide pool | Pre-challenge          | -0.7826                                            | 0.0217 |
| CD8+CD25+FoxP3+ T cells (Ag recall) | CD38+% of CD8+CD25+FoxP3+CD45RA-CD127-     | PCS1-12 peptide pool | Pre-challenge          | -0.7507                                            | 0.0319 |
| CD8+CD25+FoxP3+ T cells (Ag recall) | IL-10+% of CD8+CD25+FoxP3+CD45RA-CD127-    | PCS1-12 peptide pool | Pre-challenge          | -0.7507                                            | 0.0319 |
| CD8+CD25+FoxP3+ T cells (Ag recall) | IL-10 MFI of CD8+CD25+FoxP3+CD45RA-CD127-  | PCS1-12 peptide pool | Pre-challenge          | -0.7507                                            | 0.0319 |

Immune factors significantly correlating with number of challenges needed to cause infection were determined by Spearman rank correlation analysis. Ag: antigen (used to quantify antibody or to stimulate cells). CVL: cervicovaginal lavage wash. N/A: not applicable. Peak time point: Week 73 of vaccination schedule (1 week after final vaccination boost). Pre-challenge time point: Week 90 of vaccination schedule. Ab: antibody. Ex vivo: peripheral blood mononuclear cells (PBMCs) were not stimulated with Ag. Ag recall: PBMCs were stimulated with Ag in culture. MFI: mean fluorescent intensity. All analyses were conducted in the PCS vaccine group (n=8), except that CVL mucosal cytoine analyses were conducted in the PCS vaccine and control groups combined (n=16).

**Table S9. The index of immune variants positively correlated with 6 features in the LASSO model**

| Featrue name   | Feature variant          | variant category     | variant           | Spearman<br>Rho | P-value |
|----------------|--------------------------|----------------------|-------------------|-----------------|---------|
| CD4TregEmPD1   | CD4+ Tregs EM PD1+%      | Tcell_cytokine       | IL6 (PCS1-4)      | 0.900           | 0.002   |
| CD4TregEmPD1   | CD4+ Tregs EM PD1+%      | Tcell_cytokine       | IL6 (PCS9-12)     | 0.780           | 0.022   |
| CD4TregEmPD1   | CD4+ Tregs EM PD1+%      | Tcell_cytokine       | RANTES(PCS1-4)    | 0.866           | 0.005   |
| CD4TregEmPD1   | CD4+ Tregs EM PD1+%      | Tcell_cytokine       | MIP1a(PCS9-12)    | 0.900           | 0.002   |
| CD4TregEmPD1   | CD4+ Tregs EM PD1+%      | Tcell_cytokine       | MIP1b(PCS_Pr)     | 0.738           | 0.037   |
| CD4TregEmPD1   | CD4+ Tregs EM PD1+%      | Th17 EM              | %(ex vivo)        | 0.866           | 0.005   |
| CD4TregEmPD1   | CD4+ Tregs EM PD1+%      | CD8+ IL-17A+ CM      | %(ex vivo)        | 0.845           | 0.008   |
| CD4TregEmPD1   | CD4+ Tregs EM PD1+%      | CD8+ IL-17A+ EM      | %(ex vivo)        | 0.845           | 0.008   |
| CD4TregEmPD1   | CD4+ Tregs EM PD1+%      | CD4+ Tregs RM        | %(PCS)            | 0.866           | 0.005   |
| CD4TregEmPD1   | CD4+ Tregs EM PD1+%      | CD4+ Tregs RM        | mfi(PCS)          | 0.751           | 0.032   |
| CD4TregEmPD1   | CD4+ Tregs EM PD1+%      | CD4+ Tregs RM        | CD38+%(PCS)       | 0.926           | 0.001   |
| CD4TregEmPD1   | CD4+ Tregs EM PD1+%      | CD4+ Tregs RM        | CD38+mfi(PCS)     | 0.780           | 0.022   |
| CD4TregEmPD1   | CD4+ Tregs EM PD1+%      | CD8+ T naïve         | IFNg+mfi(ex vivo) | 0.794           | 0.019   |
| CD4TregEmPD1   | CD4+ Tregs EM PD1+%      | CD8+ T in vivo_3     | DR+CD69-          | 0.866           | 0.012   |
| CD8IL17EmCD107 | CD8+ IL17A+ TEM CD107a+% | CD4+ T in vivo_3     | DR-CD69+          | 0.793           | 0.034   |
| CD8IL17EmCD107 | CD8+ IL17A+ TEM CD107a+% | CD8+ IL-17A+ TEM RA  | CD107A+mfi(PCS)   | 0.956           | 0.000   |
| CD8IL17EmCD107 | CD8+ IL17A+ TEM CD107a+% | CD8+ IL-17A+ TEM RA  | IFNg+mfi(PCS)     | 0.852           | 0.007   |
| CD8IL17EmCD107 | CD8+ IL17A+ TEM CD107a+% | Th17 CM              | IFNg+mfi(PCS)     | 0.906           | 0.002   |
| CD8IL17EmCD107 | CD8+ IL17A+ TEM CD107a+% | Tregs total          | mfi(ex vivo)      | 0.945           | 0.000   |
| CD8IL17EmCD107 | CD8+ IL17A+ TEM CD107a+% | Tregs total          | mfi(PCS)          | 0.737           | 0.037   |
| CD8IL17EmCD107 | CD8+ IL17A+ TEM CD107a+% | CD8+ Tregs Naïve     | CD69+%(PCS)       | 0.802           | 0.017   |
| CD8IL17EmCD107 | CD8+ IL17A+ TEM CD107a+% | CD4+ TEM RA (Total)  | IL-2+%(ex vivo)   | 0.766           | 0.027   |
| CD8IL17EmCD107 | CD8+ IL17A+ TEM CD107a+% | CD4+ TEM RA (Total)  | IL-2+mfi(ex vivo) | 0.796           | 0.032   |
| CD8TcmIL2      | CD8+TCM IL2+%            | Th17 TCM             | CD107A+%(ex vivo) | 0.730           | 0.040   |
| CD8TcmIL2      | CD8+TCM IL2+%            | CD4+ Treg Naïve      | CD38+%(ex vivo)   | 0.788           | 0.020   |
| CD8TcmIL2      | CD8+TCM IL2+%            | CD4+ Treg Naïve      | CD38+mfi(ex vivo) | 0.788           | 0.020   |
| CD8TcmIL2      | CD8+TCM IL2+%            | CD8+ Treg Naïve      | %(PCS)            | 0.752           | 0.031   |
| CD8TcmIL2      | CD8+TCM IL2+%            | CD8+ Treg Naïve      | mfi(PCS)          | 0.792           | 0.019   |
| CD8TcmIL2      | CD8+TCM IL2+%            | CD8+ Treg Naïve      | MIP1b+mfi(PCS)    | 0.739           | 0.036   |
| CD8TcmIL2      | CD8+TCM IL2+%            | CD8+ Treg Naïve      | mfi(PCS)          | 0.788           | 0.020   |
| CD8TcmIL2      | CD8+TCM IL2+%            | CD8+ TEM             | IFNg+mfi(ex vivo) | 0.803           | 0.016   |
| CD8TcmIL2      | CD8+TCM IL2+%            | CD4+ TEM             | CD107A+%(PCS)     | 0.873           | 0.005   |
| CD8TcmIL2      | CD8+TCM IL2+%            | CD4+ TEM             | TNFA+mfi(PCS)     | 0.755           | 0.030   |
| CD4TreNPD1m    | CD4+Treg Naïve PD1+ mfi  | cytokine(CVL)        | RANTES(CF)        | 0.710           | 0.048   |
| CD4TreNPD1m    | CD4+Treg Naïve PD1+ mfi  | cytokine(CVL)        | IL17A(CF)         | 0.710           | 0.048   |
| CD4TreNPD1m    | CD4+Treg Naïve PD1+ mfi  | CD8+ IL-17A+ TEM RA  | %(ex vivo)        | 0.759           | 0.029   |
| CD4TreNPD1m    | CD4+Treg Naïve PD1+ mfi  | CD8+ IL-17A+ TEM RA  | mfi(ex vivo)      | 0.741           | 0.036   |
| CD4TreNPD1m    | CD4+Treg Naïve PD1+ mfi  | CD8+ IL-17A+ T naïve | IFNg+%(PCS)       | 0.757           | 0.030   |
| CD4TreNPD1m    | CD4+Treg Naïve PD1+ mfi  | CD8+ Tregs           | mfi(ex vivo)      | 0.888           | 0.003   |
| CD4TreNPD1m    | CD4+Treg Naïve PD1+ mfi  | CD4+ Tregs TEM       | PD1+(mfi)         | 0.843           | 0.009   |
| CD4TreNPD1m    | CD4+Treg Naïve PD1+ mfi  | CD4+ Tregs TEM       | CD38+%(PCS)       | 0.814           | 0.014   |
| CD4TreNPD1m    | CD4+Treg Naïve PD1+ mfi  | CD4+ Tregs TEM       | CD38+mfi(PCS)     | 0.814           | 0.014   |
| CD4TreNPD1m    | CD4+Treg Naïve PD1+ mfi  | CD4+ Tregs TEM       | PD1+%(PCS)        | 0.843           | 0.009   |
| CD4TreNPD1m    | CD4+Treg Naïve PD1+ mfi  | CD4+ Tregs TEM       | PD1+mfi (PCS)     | 0.814           | 0.014   |
| CD4TreNPD1m    | CD4+Treg Naïve PD1+ mfi  | CD4 T naïve          | Ki67%(ex vivo)    | 0.823           | 0.023   |
| CD4TreNPD1m    | CD4+Treg Naïve PD1+ mfi  | CD4+ TEM RA          | Ki67mfi(ex vivo)  | 0.823           | 0.023   |
| CD4TreNPD1m    | CD4+Treg Naïve PD1+ mfi  | CD4+ TCM             | Ki67%(ex vivo)    | 0.823           | 0.023   |
| CD4TreNPD1m    | CD4+Treg Naïve PD1+ mfi  | CD4+ TEM             | Ki67%(ex vivo)    | 0.823           | 0.023   |
| CD4TreNPD1m    | CD4+Treg Naïve PD1+ mfi  | CD4+ TEM             | Ki67mfi(ex vivo)  | 0.898           | 0.006   |
| CD4TreNPD1m    | CD4+Treg Naïve PD1+ mfi  | CD8+ T naïve         | Ki67%(ex vivo)    | 0.823           | 0.023   |
| CD4TreNPD1m    | CD4+Treg Naïve PD1+ mfi  | CD8+ T naïve         | Ki67mfi(ex vivo)  | 0.823           | 0.023   |
| CD4TreNPD1m    | CD4+Treg Naïve PD1+ mfi  | CD8+ TEM RA          | Ki67%(ex vivo)    | 0.898           | 0.006   |
| CD4TreNPD1m    | CD4+Treg Naïve PD1+ mfi  | CD8+ TCM             | Ki67%(ex vivo)    | 0.898           | 0.006   |
| CD4TreNPD1m    | CD4+Treg Naïve PD1+ mfi  | CD8+ TCM             | Ki67mfi(ex vivo)  | 0.898           | 0.006   |
| CD4TreNPD1m    | CD4+Treg Naïve PD1+ mfi  | CD8+ TEM             | Ki67%(ex vivo)    | 0.898           | 0.006   |
| CD4TreNPD1m    | CD4+Treg Naïve PD1+ mfi  | CD8+ TEM             | Ki67mfi(ex vivo)  | 0.898           | 0.006   |
| CD4TreNPD1m    | CD4+Treg Naïve PD1+ mfi  | CD4+ T naïve         | %(PCS)            | 0.759           | 0.029   |
| CD4TreNPD1m    | CD4+Treg Naïve PD1+ mfi  | CD4+ T naïve         | Ki67%(PCS)        | 0.759           | 0.029   |

**Table S9. The index of immune variants positively correlated with the 6 features in the LASSO model (continued)**

|               |                         |                       |                     |       |       |
|---------------|-------------------------|-----------------------|---------------------|-------|-------|
| CD4TreNPD1m   | CD4+Treg Naïve PD1+ mfi | CD4+ TEM RA           | %(PCS)              | 0.715 | 0.046 |
| CD4TreNPD1m   | CD4+Treg Naïve PD1+ mfi | CD4+ TCM              | %(PCS)              | 0.811 | 0.015 |
| CD4TreNPD1m   | CD4+Treg Naïve PD1+ mfi | CD4+ TCM              | mfi(PCS)            | 0.952 | 0.000 |
| CD4TreNPD1m   | CD4+Treg Naïve PD1+ mfi | CD8+ T naïve          | %(PCS)              | 0.719 | 0.044 |
| CD4TreNPD1m   | CD4+Treg Naïve PD1+ mfi | CD8+ T naïve          | mfi(PCS)            | 0.952 | 0.000 |
| CD4TreNPD1m   | CD4+Treg Naïve PD1+ mfi | CD8+ T naïve          | Ki67%(PCS)          | 0.820 | 0.013 |
| CD4TreNPD1m   | CD4+Treg Naïve PD1+ mfi | CD8+ TEM RA           | %(PCS)              | 0.719 | 0.044 |
| CD4TreNPD1m   | CD4+Treg Naïve PD1+ mfi | CD8+ TEM RA           | IFNg+%(PCS)         | 0.916 | 0.001 |
| CD4TreNPD1m   | CD4+Treg Naïve PD1+ mfi | CD8+ TEM              | Ki67%(PCS)          | 0.804 | 0.016 |
| CD8TregCmIL10 | CD8+ Tregs CM IL10+%    | CVL antibody          | PCS4(peak)          | 0.764 | 0.027 |
| CD8TregCmIL10 | CD8+ Tregs CM IL10+%    | CVL antibody          | PCS5(peak)          | 0.733 | 0.039 |
| CD8TregCmIL10 | CD8+ Tregs CM IL10+%    | CD4+ Tregs CM         | CD38+%              | 0.959 | 0.000 |
| CD8TregCmIL10 | CD8+ Tregs CM IL10+%    | CD4+ T cell_in vivo_3 | DR-CD69-            | 0.794 | 0.033 |
| CD8TregCmIL10 | CD8+ Tregs CM IL10+%    | Th17 Naïve            | CCR5+%(PCS)         | 0.959 | 0.000 |
| CD8TregCmIL10 | CD8+ Tregs CM IL10+%    | Th17 Naïve            | CD107a+mfi(PCS)     | 0.756 | 0.030 |
| CD8TregCmIL10 | CD8+ Tregs CM IL10+%    | CD8+ IL-17A+ T Naïve  | CD107a+mfi(PCS)     | 0.959 | 0.000 |
| CD8TregCmIL10 | CD8+ Tregs CM IL10+%    | CD8+ IL-17A+ T EM     | CD107a+mfi(PCS)     | 0.756 | 0.030 |
| CD8TregCmIL10 | CD8+ Tregs CM IL10+%    | CD8+ IL-17A+ T EM     | IFNg+mfi(PCS)       | 0.959 | 0.000 |
| CD8TregCmIL10 | CD8+ Tregs CM IL10+%    | CD4+ Tregs EM         | CD38+mfi(ex vivo)   | 0.875 | 0.004 |
| CD8TregCmIL10 | CD8+ Tregs CM IL10+%    | CD4+ Tregs EM         | IL10+mfi(ex vivo)   | 0.751 | 0.032 |
| CD8TregCmIL10 | CD8+ Tregs CM IL10+%    | CD8+ Tregs Naïve      | CD38+%(ex vivo)     | 0.839 | 0.009 |
| CD8TregCmIL10 | CD8+ Tregs CM IL10+%    | CD8+ Tregs Naïve      | CD38+mfi(ex vivo)   | 0.750 | 0.032 |
| CD8TregCmIL10 | CD8+ Tregs CM IL10+%    | CD8+ Tregs Naïve      | IL10+mfi(ex vivo)   | 0.839 | 0.009 |
| CD8TregCmIL10 | CD8+ Tregs CM IL10+%    | CD8+ Tregs Naïve      | PD1+%(ex vivo)      | 0.839 | 0.009 |
| CD8TregCmIL10 | CD8+ Tregs CM IL10+%    | CD8+ Tregs RM         | IL10+%(ex vivo)     | 0.756 | 0.030 |
| CD8TregCmIL10 | CD8+ Tregs CM IL10+%    | CD8+ Tregs RM         | IL10+mfi(ex vivo)   | 0.756 | 0.030 |
| CD8TregCmIL10 | CD8+ Tregs CM IL10+%    | CD8+ Tregs EM         | CD69+%(ex vivo)     | 0.756 | 0.030 |
| CD8TregCmIL10 | CD8+ Tregs CM IL10+%    | CD8+ Tregs EM         | CD69+mfi(ex vivo)   | 0.756 | 0.030 |
| CD8TregCmIL10 | CD8+ Tregs CM IL10+%    | CD8+ Tregs EM         | IL10+%(ex vivo)     | 0.756 | 0.030 |
| CD8TregCmIL10 | CD8+ Tregs CM IL10+%    | CD8+ Tregs EM         | IL10+mfi(ex vivo)   | 0.756 | 0.030 |
| CD8TregCmIL10 | CD8+ Tregs CM IL10+%    | CD4+ Tregs Naïve      | MIP1b+%(PCS)        | 0.959 | 0.000 |
| CD8TregCmIL10 | CD8+ Tregs CM IL10+%    | CD4+ Tregs RM         | IL10+%(PCS)         | 0.756 | 0.030 |
| CD8TregCmIL10 | CD8+ Tregs CM IL10+%    | CD4+ Tregs CM         | CD38+mfi(PCS)       | 1.000 | .     |
| CD8TregCmIL10 | CD8+ Tregs CM IL10+%    | CD4+ Tregs CM         | CD69+%(PCS)         | 0.756 | 0.030 |
| CD8TregCmIL10 | CD8+ Tregs CM IL10+%    | CD4+ Tregs CM         | IL10+%(PCS)         | 0.839 | 0.009 |
| CD8TregCmIL10 | CD8+ Tregs CM IL10+%    | CD4+ Tregs CM         | IL10+mfi(PCS)       | 0.875 | 0.004 |
| CD8TregCmIL10 | CD8+ Tregs CM IL10+%    | CD4+ Tregs EM         | %(PCS)              | 0.756 | 0.030 |
| CD8TregCmIL10 | CD8+ Tregs CM IL10+%    | CD8+ Tregs RM         | CD69+%(PCS)         | 0.756 | 0.030 |
| CD8TregCmIL10 | CD8+ Tregs CM IL10+%    | CD8+ Tregs RM         | CD69+mfi(PCS)       | 0.756 | 0.030 |
| CD8TregCmIL10 | CD8+ Tregs CM IL10+%    | CD8+ Tregs RM         | IL10+mfi(PCS)       | 0.756 | 0.030 |
| CD8TregCmIL10 | CD8+ Tregs CM IL10+%    | CD8+ Tregs RM         | MIP1b+%(PCS)        | 0.756 | 0.030 |
| CD8TregCmIL10 | CD8+ Tregs CM IL10+%    | CD8+ Tregs RM         | MIP1b+mfi(PCS)      | 0.756 | 0.030 |
| CD8TregCmIL10 | CD8+ Tregs CM IL10+%    | CD8+ Tregs CM         | CD38+%(PCS)         | 0.839 | 0.009 |
| CD8TregCmIL10 | CD8+ Tregs CM IL10+%    | CD8+ Tregs CM         | CD69+mfi(PCS)       | 0.756 | 0.030 |
| CD8TregCmIL10 | CD8+ Tregs CM IL10+%    | CD8+ Tregs CM         | IL10+mfi(PCS)       | 1.000 | .     |
| CD8TregCmIL10 | CD8+ Tregs CM IL10+%    | CD8+ Tregs CM         | MIP1b+%(PCS)        | 0.875 | 0.004 |
| CD8TregCmIL10 | CD8+ Tregs CM IL10+%    | CD8+ Tregs CM         | MIP1b+mfi(PCS)      | 1.000 | .     |
| CD8TregCmIL10 | CD8+ Tregs CM IL10+%    | CD8+ Tregs EM         | CD38+%(PCS)         | 0.959 | 0.000 |
| CD8TregCmIL10 | CD8+ Tregs CM IL10+%    | CD8+ Tregs EM         | CD69+%(PCS)         | 0.756 | 0.030 |
| CD8TregCmIL10 | CD8+ Tregs CM IL10+%    | CD8+ Tregs EM         | CD69+mfi(PCS)       | 0.756 | 0.030 |
| CD8TregCmIL10 | CD8+ Tregs CM IL10+%    | CD8+ Tregs EM         | IL10+%(PCS)         | 0.959 | 0.000 |
| CD8TregCmIL10 | CD8+ Tregs CM IL10+%    | CD8+ Tregs EM         | IL10+mfi(PCS)       | 0.959 | 0.000 |
| CD8TregCmIL10 | CD8+ Tregs CM IL10+%    | CD8+ TEM RA           | CD107A+%(ex vivo)   | 0.765 | 0.027 |
| CD8TregCmIL10 | CD8+ Tregs CM IL10+%    | CD8+ TEM RA           | CD107A+mfi(ex vivo) | 0.765 | 0.027 |
| CD8TregCmIL10 | CD8+ Tregs CM IL10+%    | CD8+ T naïve          | IL2+mfi(PCS)        | 0.711 | 0.048 |
| CD4TreCmCD38  | CD4+ Tregs CM CD38+%    | CD8+ Tregs CM         | IL10+%(PCS)         | 0.959 | 0.000 |
| CD4TreCmCD38  | CD4+ Tregs CM CD38+%    | CVL antibody          | PCS4(peak)          | 0.733 | 0.039 |
| CD4TreCmCD38  | CD4+ Tregs CM CD38+%    | CVL antibody          | PCS5(peak)          | 0.764 | 0.027 |
| CD4TreCmCD38  | CD4+ Tregs CM CD38+%    | CD4+ T cell_in vivo_3 | DR-CD69-            | 0.794 | 0.033 |
| CD4TreCmCD38  | CD4+ Tregs CM CD38+%    | Th17 Tnaive           | CCR5+%(PCS)         | 1.000 | .     |
| CD4TreCmCD38  | CD4+ Tregs CM CD38+%    | Th17 TEM RA           | CD38+mfi(PCS)       | 0.750 | 0.032 |
| CD4TreCmCD38  | CD4+ Tregs CM CD38+%    | Th17 TEM RA           | CD107A+mfi(PCS)     | 0.750 | 0.032 |

Table S9. The index of immune variants positively correlated with 6 features in the LASSO model (continued)

|              |                      |                     |                     |       |       |
|--------------|----------------------|---------------------|---------------------|-------|-------|
| CD4TreCmCD38 | CD4+ Tregs CM CD38+% | Th17 TEM RA         | IFNg+%(PCS)         | 0.750 | 0.032 |
| CD4TreCmCD38 | CD4+ Tregs CM CD38+% | CD8+ IL-17A+ Tnaive | CD107A+mfi(PCS)     | 1.000 | .     |
| CD4TreCmCD38 | CD4+ Tregs CM CD38+% | CD4+ Tregs EM       | CD38+%(ex vivo)     | 0.750 | 0.032 |
| CD4TreCmCD38 | CD4+ Tregs CM CD38+% | CD4+ Tregs EM       | CD38+mfi(ex vivo)   | 0.839 | 0.009 |
| CD4TreCmCD38 | CD4+ Tregs CM CD38+% | CD4+ Tregs EM       | IL10+mfi(ex vivo)   | 0.783 | 0.022 |
| CD4TreCmCD38 | CD4+ Tregs CM CD38+% | CD8+ Tregs Naïve    | CD38+%(ex vivo)     | 0.875 | 0.004 |
| CD4TreCmCD38 | CD4+ Tregs CM CD38+% | CD8+ Tregs Naïve    | IL10+%(ex vivo)     | 0.750 | 0.032 |
| CD4TreCmCD38 | CD4+ Tregs CM CD38+% | CD8+ Tregs Naïve    | IL10+mfi(ex vivo)   | 0.875 | 0.004 |
| CD4TreCmCD38 | CD4+ Tregs CM CD38+% | CD8+ Tregs Naïve    | PD1+%(ex vivo)      | 0.875 | 0.004 |
| CD4TreCmCD38 | CD4+ Tregs CM CD38+% | CD8+ Tregs CM       | CD38+mfi(PCS)       | 0.750 | 0.032 |
| CD4TreCmCD38 | CD4+ Tregs CM CD38+% | CD8+ Tregs CM       | IL10+mfi(PCS)       | 0.959 | 0.000 |
| CD4TreCmCD38 | CD4+ Tregs CM CD38+% | CD8+ Tregs CM       | MIP1b+%(PCS)        | 0.839 | 0.009 |
| CD4TreCmCD38 | CD4+ Tregs CM CD38+% | CD8+ Tregs CM       | MIP1b+mfi(PCS)      | 0.959 | 0.000 |
| CD4TreCmCD38 | CD4+ Tregs CM CD38+% | CD8+ Tregs EM       | CD38+%(PCS)         | 1.000 | .     |
| CD4TreCmCD38 | CD4+ Tregs CM CD38+% | CD8+ Tregs EM       | CD38+mfi(PCS)       | 0.756 | 0.030 |
| CD4TreCmCD38 | CD4+ Tregs CM CD38+% | CD8+ Tregs EM       | IL10+%(PCS)         | 1.000 | .     |
| CD4TreCmCD38 | CD4+ Tregs CM CD38+% | CD8+ Tregs EM       | IL10+mfi(PCS)       | 1.000 | .     |
| CD4TreCmCD38 | CD4+ Tregs CM CD38+% | CD8+ T naïve        | mfi(ex vivo)        | 0.713 | 0.047 |
| CD4TreCmCD38 | CD4+ Tregs CM CD38+% | CD8+ TEM RA         | CD107A+%(ex vivo)   | 0.819 | 0.013 |
| CD4TreCmCD38 | CD4+ Tregs CM CD38+% | CD8+ TEM RA         | CD107A+mfi(ex vivo) | 0.819 | 0.013 |
| CD4TreCmCD38 | CD4+ Tregs CM CD38+% | CD8+ TEM RA         | IL2+mfi(ex vivo)    | 0.770 | 0.043 |
| CD4TreCmCD38 | CD4+ Tregs CM CD38+% | CD4+ T naïve        | CD107A+%(PCS)       | 0.756 | 0.030 |
| CD4TreCmCD38 | CD4+ Tregs CM CD38+% | CD4+ T naïve        | IL2+mfi(PCS)        | 0.761 | 0.028 |
| CD4TreCmCD38 | CD4+ Tregs CM CD38+% | CD8+ T naïve        | CD107A+%(PCS)       | 0.756 | 0.030 |
| CD4TreCmCD38 | CD4+ Tregs CM CD38+% | CD8+ T naïve        | Ki67mfi(PCS)        | 0.756 | 0.030 |
| CD4TreCmCD38 | CD4+ Tregs CM CD38+% | CD8+ TEM RA         | IL2+mfi(PCS)        | 0.756 | 0.030 |

- P values are not corrected for multiple comparison.



**Table S10. A List of capture and detection antibodies, and protein standards used in the Bio-Plex Multiplexed cytokine/chemokine assays**

| <b>Protein Standards</b>                         |                    |                         |
|--------------------------------------------------|--------------------|-------------------------|
| <b>Name</b>                                      | <b>Catalog No.</b> | <b>Manufacturer</b>     |
| Recombinant Human CXCL8/IL-8 Protein             | 208-IL-10          | R&D system              |
| Recombinant Human CCL5/RANTES Protein            | 278-RN-10          | R&D system              |
| Recombinant Human GM-CSF Protein                 | 215-GM             | R&D system              |
| Recombinant Human Interferon Gamma Protein       | RIFNG50            | ThermoFisher scientific |
| Recombinant Human IL-1 beta/IL-1F2               | 201-LB             | R&D system              |
| Recombinant Human IL-6 Protein                   | 206-IL-10          | R&D system              |
| Recombinant Human IL-10 (aa 19-178) Protein      | 1064-IL            | R&D system              |
| Recombinant Human IL-17A Protein                 | 317-ILB            | R&D system              |
| Recombinant Human CXCL10/IP-10                   | 266-IP             | R&D system              |
| Recombinant Human CCL2/MCP-1 Protein             | 279-MC             | R&D system              |
| Recombinant Human CCL3/MIP-1 alpha protein       | 270-LD-10          | R&D system              |
| Recombinant Human CCL4/MIP-1 beta Protein        | 271-BME-10         | R&D system              |
| Recombinant Human TNF-alpha Protein              | 210-TA-20          | R&D system              |
| Recombinant Human IL-1 alpha                     | 200-LA             | R&D system              |
| <b>Capture Antibodies</b>                        |                    |                         |
| <b>Name</b>                                      | <b>Catalog No.</b> | <b>Manufacturer</b>     |
| Human CXCL8/IL-8 MAb                             | M801               | ThermoFisher Scientific |
| Human CCL5/RANTES PAb                            | P230E              | ThermoFisher Scientific |
| Rat Anti-Human GM-CSF-UNLB                       | 10111-01           | SouthernBiotech         |
| Human IFN $\gamma$ MAb                           | M700A              | ThermoFisher Scientific |
| Human IL-1beta/ IL-1F2 Antibody                  | MAB601-500         | R&D System              |
| Human IL-6 MAb                                   | M620               | ThermoFisher Scientific |
| Rat Anti-Human IL-10-UNLB                        | 10100-01           | SouthernBiotech         |
| Human/Primate IL-17/IL-17A Antibody              | MAB317-500         | R&D System              |
| Human IP-10/ CXCL10/CRG-2 Antibody               | MAB266-500         | R&D System              |
| Human MCP-1/CCL2/JE Antibody                     | MAB679-500         | R&D System              |
| Human MIP-1 $\alpha$ /CCL3Antibody               | AF-270-NA          | R&D System              |
| Human MIP-1 $\beta$ /CCL4 Antibody               | MAB271-100         | R&D System              |
| Human TNF $\alpha$ MAb                           | M303               | ThermoFisher Scientific |
| Human IL-1 alpha/IL-1F1 Mab                      | MAB200             | R&D system              |
| <b>Detection Antibodies</b>                      |                    |                         |
| <b>Name</b>                                      | <b>Catalog No.</b> | <b>Manufacturer</b>     |
| Human CXCL8/IL-8 MAb, Biotin-labeled             | M802B              | ThermoFisher Scientific |
| Human CCL5/RANTES MAb, Biotin-labeled            | M230B              | ThermoFisher Scientific |
| Rat Anti-Human GM-CSF-BIOT                       | 10112-08           | SouthernBiotech         |
| Human IFN $\gamma$ MAb, Biotin-labeled           | M701B              | ThermoFisher Scientific |
| Human IL-1beta/IL-1F2 Biotinylated Antibody      | BAF201             | R&D System              |
| Human IL-6 MAb, Biotin-labeled                   | M621B              | ThermoFisher Scientific |
| Rat Anti-Human IL-10-BIOT                        | 10110-08           | SouthernBiotech         |
| Human/Primate IL-17/IL-17A Biotinylated Antibody | BAF317             | R&D System              |
| Human IP-10/CXCL10/CRG-2 Biotinylated Antibody   | BAF266             | R&D System              |
| Human MCP-1/CCL2/JE Biotinylated Antibody        | BAF279             | R&D System              |
| Human MIP-1 $\alpha$ /CCL3 Biotinylated Antibody | BAF270             | R&D System              |
| Human MIP-1 $\beta$ /CCL4 Biotinylated Antibody  | BAF271             | R&D System              |
| Human TNF $\alpha$ MAb, Biotin-labeled           | M302B              | ThermoFisher Scientific |
| Human IL-1 alpha/IL-1F1 Biotinylated             | BAF200             | R&D system              |

**Table S11 Final concentration of the standard pool in the Bio-Plex Multiplexed cytokine/chemokine assays**

| <b>Name</b>                                 | <b>Concentration in pg/mL</b> |
|---------------------------------------------|-------------------------------|
| Recombinant Human CXCL8/IL-8 Protein        | 27000                         |
| Recombinant Human CCL5/RANTES Protein       | 18500                         |
| Recombinant Human GM-CSF Protein            | 17000                         |
| Recombinant Human Interferon Gamma Protein  | 10500                         |
| Recombinant Human IL-1 beta/IL-1F2          | 19500                         |
| Recombinant Human IL-6 Protein              | 9500                          |
| Recombinant Human IL-10 (aa 19-178) Protein | 28000                         |
| Recombinant Human IL-17A Protein            | 38000                         |
| Recombinant Human CXCL10/IP-10              | 24000                         |
| Recombinant Human CCL2/MCP-1 Protein        | 26500                         |
| Recombinant Human CCL3/MIP-1 alpha protein  | 27500                         |
| Recombinant Human CCL4/MIP-1 beta Protein   | 9000                          |
| Recombinant Human TNF-alpha Protein         | 18000                         |
| Recombinant Human IL-1 alpha                | 160000                        |

**Table S12. SIV PCS peptides used to stimulate PBMCs for testing antigen recall responses**

| Peptide | Peptide Sequence            |
|---------|-----------------------------|
| PCS1-1  | [H]APSSGRGGNYPVQQI[OH]      |
| PCS1-2  | [H]SGRGGNYPVQQIGGN[OH]      |
| PCS1-3  | [H]RGGNYPVQQIGGNYV[OH]      |
| PCS2-1  | [H]GGPGQKARLMAEALK[OH]      |
| PCS2-2  | [H]GQKARLMAEALKEAL[OH]      |
| PCS2-3  | [H]KARLMAEALKEALAP[OH]      |
| PCS3-1  | [H]LAPVPIPFAAAQQRG[OH]      |
| PCS3-2  | [H]VPIPFAAAQQRGPRK[OH]      |
| PCS3-3  | [H]IPFAAAQQRGPRKPI[OH]      |
| PCS4-1  | [H]MAKCPDRQAGFLGLG[OH]      |
| PCS4-2  | [H]CPDRQAGFLGLGPWG[OH]      |
| PCS4-3  | [H]DRQAGFLGLGPWGKK[OH]      |
| PCS5-1  | [H]GPWGKKPRNFPMAQVHQGLM[OH] |
| PCS5-2  | [H]YGQMPRQTGGFFRPWSMGKE[OH] |
| PCS5-3  | [H]KPRNFPMAQVHQGLM[OH]      |
| PCS6-1  | [H]YGQMPRQTGGFFRPW[OH]      |
| PCS6-2  | [H]MPRQTGGFFRPWSMG[OH]      |
| PCS6-3  | [H]RQTGGFFRPWSMGKE[OH]      |
| PCS7-1  | [H]WSMGKEAPQFPHGSS[OH]      |
| PCS7-2  | [H]GKEAPQFPHGSSASG[OH]      |
| PCS7-3  | [H]EAPQFPHGSSASGAD[OH]      |
| PCS8-1  | [H]LQGGDRGFAAPQFSL[OH]      |
| PCS8-2  | [H]GDRGFAAPQFSLWRR[OH]      |
| PCS8-3  | [H]RGFAAPQFSLWRRPV[OH]      |
| PCS9-1  | [H]LTALGMSLNFPIAKV[OH]      |
| PCS9-2  | [H]LGMSLNFPIAKVEPV[OH]      |
| PCS9-3  | [H]MSLNFPIAKVEPVKV[OH]      |
| PCS10-1 | [H]KDPIEGEETYYTDGS[OH]      |
| PCS10-2 | [H]IEGEETYYTDGSCNK[OH]      |
| PCS10-3 | [H]GEETYYTDGSCNKQS[OH]      |
| PCS11-1 | [H]LVSQGIRQVLFLEKI[OH]      |
| PCS11-2 | [H]QGIRQVLFLEKIEPA[OH]      |
| PCS11-3 | [H]IRQVLFLEKIEPAQE[OH]      |
| PCS12-1 | [H]NQGQYMNTPWNPAPAE[OH]     |
| PCS12-2 | [H]QYMNTPWNPAPAEERE[OH]     |
| PCS12-3 | [H]MNTPWNPAPAEEREKL[OH]     |

**Table S13. Flow cytometry panel design**

| <b>T cell Panel 1</b> |                     |                     |
|-----------------------|---------------------|---------------------|
| <b>Marker</b>         | <b>Fluorochrome</b> | <b>Clone</b>        |
| Live/Dead             | Blue (405)          | reactive dye        |
| CD3                   | V500                | SP34-2              |
| CD4                   | BV605               | L200                |
| CD8                   | V450                | RP8-T4              |
| CCR7                  | A700                | 150503              |
| CD127 (IL-7)          | PE-CF594            | HIL-7R-M2           |
| CD107a                | PE-Cy5              | H4:A3               |
| IL-2                  | FITC                | MQ1-17H12           |
| IFN $\gamma$          | BV786               | 4S.B3               |
| TNF $\alpha$          | APC                 | MAb11               |
| Ki67                  | PE-Cy7              | B56                 |
| MIP1b                 | PE                  | D21-1351            |
| CD45RO                | APC-H7              | UCHL1               |
| IL-17A                | BV650               | N49-653             |
| <b>Marker</b>         | <b>Fluorochrome</b> | <b>Clone</b>        |
| <b>T cell Panel 2</b> |                     |                     |
| <b>Marker</b>         | <b>Fluorochrome</b> | <b>Clone</b>        |
| Live/Dead             | Blue (405)          | reactive dye        |
| CD3                   | V500                | SP34-2              |
| CD4                   | BV605               | L200                |
| CD8                   | APC-Cy7             | RP8-T4              |
| CCR7                  | Alexa700            | 150503              |
| CD38                  | FITC                | HB7                 |
| PD-1                  | BV650               | M1H4                |
| CD69                  | APC                 | FN50                |
| Foxp3                 | V450                | 259D/C7             |
| CD127                 | Pe-CF594            | HIL-7R-M2           |
| IL-10                 | BV711               | JES3-9D7            |
| CD25                  | PE-CY5              | M-A251              |
| CD45RA                | PE-Cy7              | L48                 |
| MIP1b                 | PE                  | D21-1351            |
| <b>Live/Dead</b>      | <b>Blue (405)</b>   | <b>reactive dye</b> |
| CD3                   | V500                | SP34-2              |
| CD4                   | BV605               | L200                |
| CD8                   | V450                | RP8-T4              |
| CCR7                  | A700                | 150503              |
| CD127 (IL-7)          | PE-CF594            | HIL-7R-M2           |
| MIP1b                 | PE                  | D21-1351            |
| CD45RO                | APC-H7              | UCHL1               |
| IL-17A                | BV650               | N49-653             |
| CD195 (CCR5)          | PE-Cy7              | 2D7/CCR5            |
| CD38                  | FITC                | HB7                 |
| CD69                  | APC                 | FN50                |
| CD107a                | PE-Cy5              | H4:A3               |
| IFN $\gamma$          | BV786               | 4S.B3               |

**Table S14. List of fluorescent flow cytometry antibodies**

| Name                                                                       | Company        | Catalogue Number |
|----------------------------------------------------------------------------|----------------|------------------|
| LIVE/DEAD™ Fixable Blue Dead Cell Stain Kit, for 405 nm                    | ThermoFisher   | L23105           |
| CD3 V500 (SP34-2)                                                          | BD Biosciences | 560770           |
| CD4 BV605 (L200)                                                           | BD Biosciences | 562843           |
| CD8 V450 (RP8-T4)                                                          | BD Biosciences | 560347           |
| CD127 PE-CF594 (HIL-7R-M2)                                                 | BD Biosciences | 562397           |
| CD107a PE-Cy5 (H4A3)                                                       | BD Biosciences | 555802           |
| IFNg BV786 (4S.B3)                                                         | BD Biosciences | 563731           |
| CD195 (CCR5)                                                               | BD Biosciences | 557752           |
| BCL-6 PE                                                                   | BD Biosciences | 561522           |
| CD45RO APC-H7                                                              | BD Biosciences | 561137           |
| IL-17A BV650                                                               | BD Biosciences | 563746           |
| CD38 FITC HB7                                                              | BD Biosciences | 340909           |
| CD69 APC FN50                                                              | BD Biosciences | 555533           |
| Foxp3 V450 259D/C7                                                         | BD Biosciences | 560459           |
| Foxp3 Human buffer                                                         | BD Pharmingen  | 560098           |
| IL-10 JES3-9D7                                                             | BD Biosciences | 564050           |
| CD25 M-A251                                                                | BD Biosciences | 555433           |
| PD-1 BV650 M1H4                                                            | BD Biosciences | 564324           |
| Cytoperm/Cytofix Plus permeabilization solution kit with BD Golgistop/plug | BD Biosciences | 554715           |
| Brilliant Stain Buffer                                                     | BD Biosciences | 563794           |
